# Supplementary material for: Using physical property surrogate models to perform accelerated multi-fidelity optimization of force field parameters
Source: Royal Society of Chemistry journal article supplement (doi:10.1039/d2dd00138a), 2023-01-01
Supplement: d2dd00138a1.pdf [file d2dd00138a1.pdf]

# Supporting Information for “Using physical property surrogate models to perform accelerated multi-fidelity optimization of force field parameters”

Owen C. Madin<sup>1,†</sup> and Michael R. Shirts<sup>1</sup>

<sup>1</sup>Department of Chemical & Biological Engineering, University of Colorado Boulder, Boulder, CO, USA  
80309

**\*For correspondence:**

michael.shirts@colorado.edu (MRS)

# 1 Training set composition

## 1.1 "Pure only"

| Molecule                | SMILES                         | Category |
|-------------------------|--------------------------------|----------|
| Acetic Acid             | <chem>CC(=O)O</chem>           | Acid     |
| Methanol                | <chem>CO</chem>                | Alcohol  |
| Ethanol                 | <chem>CCO</chem>               | Alcohol  |
| Propan-1-ol             | <chem>CCCO</chem>              | Alcohol  |
| Propan-2-ol             | <chem>CC(C)O</chem>            | Alcohol  |
| Butanol                 | <chem>CCCCO</chem>             | Alcohol  |
| 2-Methylpropan-1-ol     | <chem>CC(C)CO</chem>           | Alcohol  |
| 2-Methylpropan-2-ol     | <chem>CC(C)(C)O</chem>         | Alcohol  |
| Ethyl acetate           | <chem>CCOC(C)=O</chem>         | Ester    |
| Propyl acetate          | <chem>CCCOC(C)=O</chem>        | Ester    |
| Butyl acetate           | <chem>CCCCOC(C)=O</chem>       | Ester    |
| Methyl formate          | <chem>COC=O</chem>             | Ester    |
| Diethyl malonate        | <chem>CCOC(=O)CC(=O)OCC</chem> | Ester    |
| 1,4-Dioxane             | <chem>C1COCCO1</chem>          | Ether    |
| Oxane                   | <chem>C1CCOCC1</chem>          | Ether    |
| Methyl tert-butyl ether | <chem>COC(C)(C)C</chem>        | Ether    |
| Diisopropyl ether       | <chem>CC(C)OC(C)C</chem>       | Ether    |
| Butyl ether             | <chem>CCCCOCCCC</chem>         | Ether    |
| Cyclopentanone          | <chem>O=C1CCCC1</chem>         | Ketone   |
| Pentan-2-one            | <chem>CCCC(C)=O</chem>         | Ketone   |
| Cyclohexanone           | <chem>O=C1CCCCC1</chem>        | Ketone   |
| Cycloheptanone          | <chem>O=C1CCCCC1</chem>        | Ketone   |
| Cyclohexane             | <chem>C1CCCCC1</chem>          | Alkane   |
| Hexane                  | <chem>CCCCCC</chem>            | Alkane   |
| Methylcyclohexane       | <chem>CC1CCCCC1</chem>         | Alkane   |
| Heptane                 | <chem>CCCCCCC</chem>           | Alkane   |
| 2,2,4-Trimethylpentane  | <chem>CC(C)CC(C)(C)C</chem>    | Alkane   |
| Decane                  | <chem>CCCCCCCCCC</chem>        | Alkane   |

**Figure 1.** Molecules in the "pure only" training set, along with their corresponding SMILES strings and categories.

## 1.2 "Mixture only"

| Molecule 1              | Molecule 2             | SMILES 1                       | SMILES 2                    | Category 1 | Category 2 |
|-------------------------|------------------------|--------------------------------|-----------------------------|------------|------------|
| Oxane                   | Cyclohexanone          | <chem>C1CCOCC1</chem>          | <chem>O=C1CCCCC1</chem>     | Ether      | Ketone     |
| Ethanol                 | 2,2,4-Trimethylpentane | <chem>CCO</chem>               | <chem>CC(C)CC(C)(C)C</chem> | Alcohol    | Alkane     |
| Butanol                 | Heptane                | <chem>CCCCO</chem>             | <chem>CCCCCCC</chem>        | Alcohol    | Alkane     |
| Diisopropyl ether       | 2,2,4-Trimethylpentane | <chem>CC(C)OC(C)C</chem>       | <chem>CC(C)CC(C)(C)C</chem> | Ether      | Alkane     |
| 1,4-Dioxane             | Cyclopentanone         | <chem>C1COCCO1</chem>          | <chem>O=C1CCCC1</chem>      | Ether      | Ketone     |
| 2-Methylpropan-2-ol     | Butyl acetate          | <chem>CC(C)(C)O</chem>         | <chem>CCCCOC(C)=O</chem>    | Alcohol    | Ester      |
| Propan-1-ol             | Cyclohexane            | <chem>CCCO</chem>              | <chem>C1CCCCC1</chem>       | Alcohol    | Alkane     |
| Propan-1-ol             | Methylcyclohexane      | <chem>CCCO</chem>              | <chem>CC1CCCCC1</chem>      | Alcohol    | Alkane     |
| Diethyl malonate        | Butanol                | <chem>CCOC(=O)CC(=O)OCC</chem> | <chem>CCCCO</chem>          | Ester      | Alcohol    |
| 2-Methylpropan-2-ol     | Methyl formate         | <chem>CC(C)(C)O</chem>         | <chem>COC=O</chem>          | Alcohol    | Ester      |
| Diethyl malonate        | Methanol               | <chem>CCOC(=O)CC(=O)OCC</chem> | <chem>CO</chem>             | Ester      | Alcohol    |
| Propan-1-ol             | 2,2,4-Trimethylpentane | <chem>CCCO</chem>              | <chem>CC(C)CC(C)(C)C</chem> | Alcohol    | Alkane     |
| Oxane                   | Cyclohexane            | <chem>C1CCOCC1</chem>          | <chem>C1CCCCC1</chem>       | Ether      | Alkane     |
| Butanol                 | Methylcyclohexane      | <chem>CCCCO</chem>             | <chem>CC1CCCCC1</chem>      | Alcohol    | Alkane     |
| Oxane                   | Pentan-2-one           | <chem>C1CCOCC1</chem>          | <chem>CCCC(C)=O</chem>      | Ether      | Ketone     |
| 1,4-Dioxane             | Cyclohexanone          | <chem>C1COCCO1</chem>          | <chem>O=C1CCCCC1</chem>     | Ether      | Ketone     |
| Butanol                 | 2,2,4-Trimethylpentane | <chem>CCCCO</chem>             | <chem>CC(C)CC(C)(C)C</chem> | Alcohol    | Alkane     |
| 1,4-Dioxane             | Pentan-2-one           | <chem>C1COCCO1</chem>          | <chem>CCCC(C)=O</chem>      | Ether      | Ketone     |
| Butanol                 | Hexane                 | <chem>CCCCO</chem>             | <chem>CCCCCC</chem>         | Alcohol    | Alkane     |
| Oxane                   | Methylcyclohexane      | <chem>C1CCOCC1</chem>          | <chem>CCCCCCC</chem>        | Ether      | Alkane     |
| Diethyl malonate        | 2-Methylpropan-1-ol    | <chem>CCOC(=O)CC(=O)OCC</chem> | <chem>CC(C)CO</chem>        | Ester      | Alcohol    |
| Ethanol                 | Ethyl acetate          | <chem>CCO</chem>               | <chem>CCOC(C)=O</chem>      | Alcohol    | Ester      |
| Diethyl malonate        | Propan-2-ol            | <chem>CCOC(=O)CC(=O)OCC</chem> | <chem>CC(C)O</chem>         | Ester      | Alcohol    |
| 1,4-Dioxane             | Cycloheptanone         | <chem>C1COCCO1</chem>          | <chem>O=C1CCCCC1</chem>     | Ether      | Ketone     |
| Methyl formate          | Methanol               | <chem>COC=O</chem>             | <chem>CO</chem>             | Ester      | Alcohol    |
| Methyl tert-butyl ether |                        | <chem>COC(C)(C)C</chem>        | <chem>CCCCCCCCC</chem>      | Ether      | Alkane     |
| Oxane                   | Hexane                 | <chem>C1CCOCC1</chem>          | <chem>CCCCCC</chem>         | Ether      | Alkane     |
| Diisopropyl ether       | Heptane                | <chem>CC(C)OC(C)C</chem>       | <chem>CCCCCCC</chem>        | Ether      | Alkane     |
| Diethyl malonate        | Ethanol                | <chem>CCOC(=O)CC(=O)OCC</chem> | <chem>CCO</chem>            | Ester      | Alcohol    |
| Ethanol                 | Acetic Acid            | <chem>CCO</chem>               | <chem>CC(=O)O</chem>        | Alcohol    | Acid       |
| Oxane                   | Cyclopentanone         | <chem>C1CCOCC1</chem>          | <chem>O=C1CCCC1</chem>      | Ether      | Ketone     |
| Butyl ether             | 2,2,4-Trimethylpentane | <chem>CCCCOCCCC</chem>         | <chem>CC(C)CC(C)(C)C</chem> | Ether      | Alkane     |

**Figure 2.** Molecules in the binary mixtures in the "mixture only" training set, along with their corresponding SMILES strings and categories.

## 2 Training set performance

### 2.1 "Pure only" optimization, $N=5$

### 2.1.1 Run 1

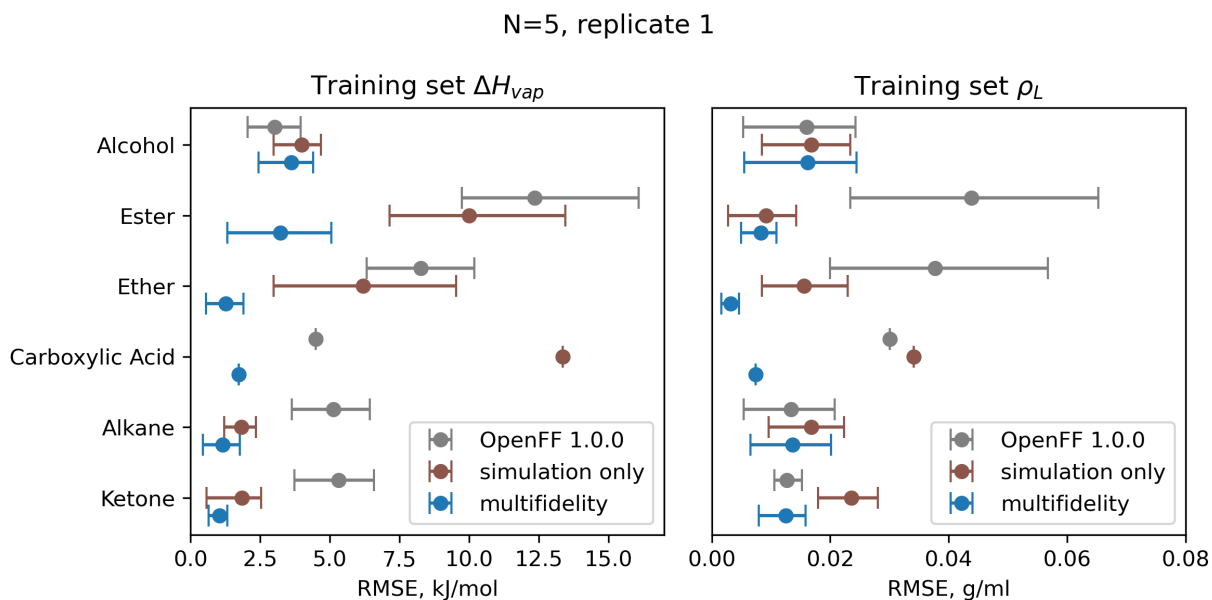

**Figure 3.** RMSE in training set  $\Delta H_{vap}$  and  $\rho_L$ , for OpenFF 1.0.0, simulation-only refit parameters, and retrained parameters from  $N=5$  initial points multi-fidelity run 1. Error bars represent bootstrapped 95% confidence intervals

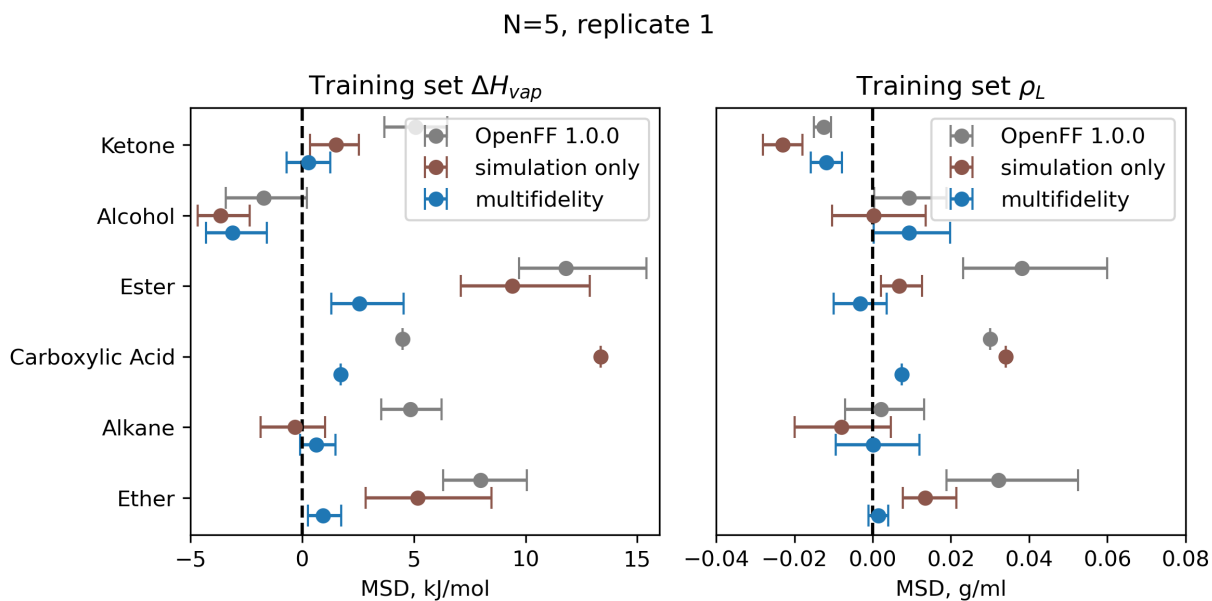

**Figure 4.** Bias in training set  $\Delta H_{vap}$  and  $\rho_L$ , as measured by the mean signed deviation (MSD), for OpenFF 1.0.0, simulation-only refit, and retrained parameters from  $N=5$  multi-fidelity run 1. Error bars represent bootstrapped 95% confidence intervals

## 2.1.2 Run 2

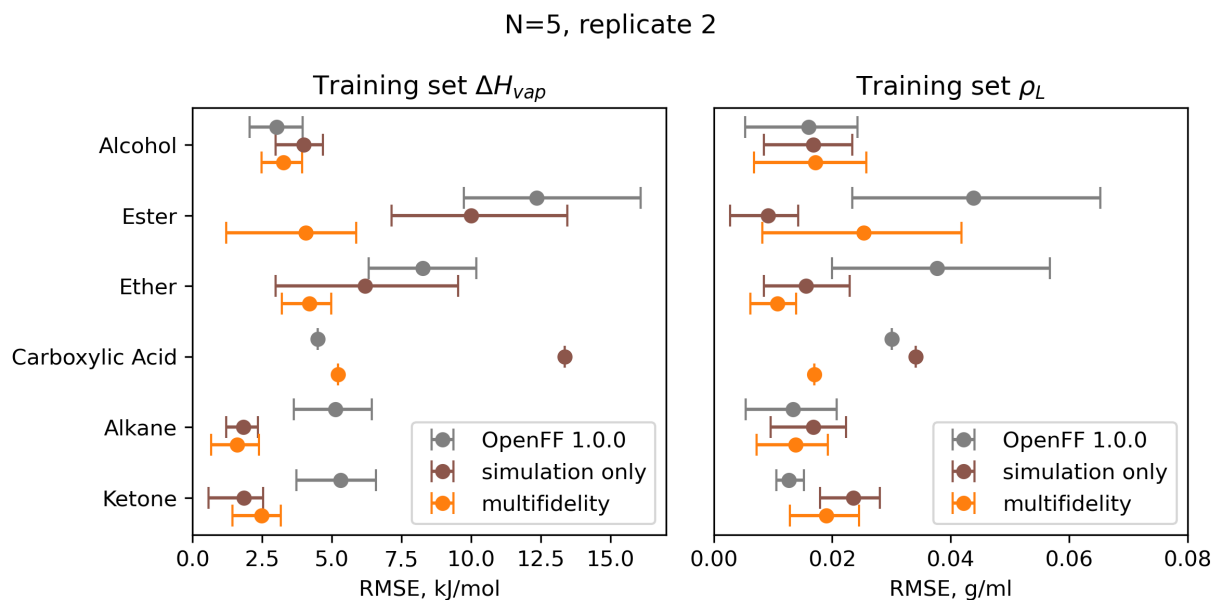

**Figure 5.** RMSE in training set  $\Delta H_{vap}$  and  $\rho_L$ , for OpenFF 1.0.0, simulation-only refit parameters, and retrained parameters from  $N=5$  initial points multi-fidelity run 2. Error bars represent bootstrapped 95% confidence intervals

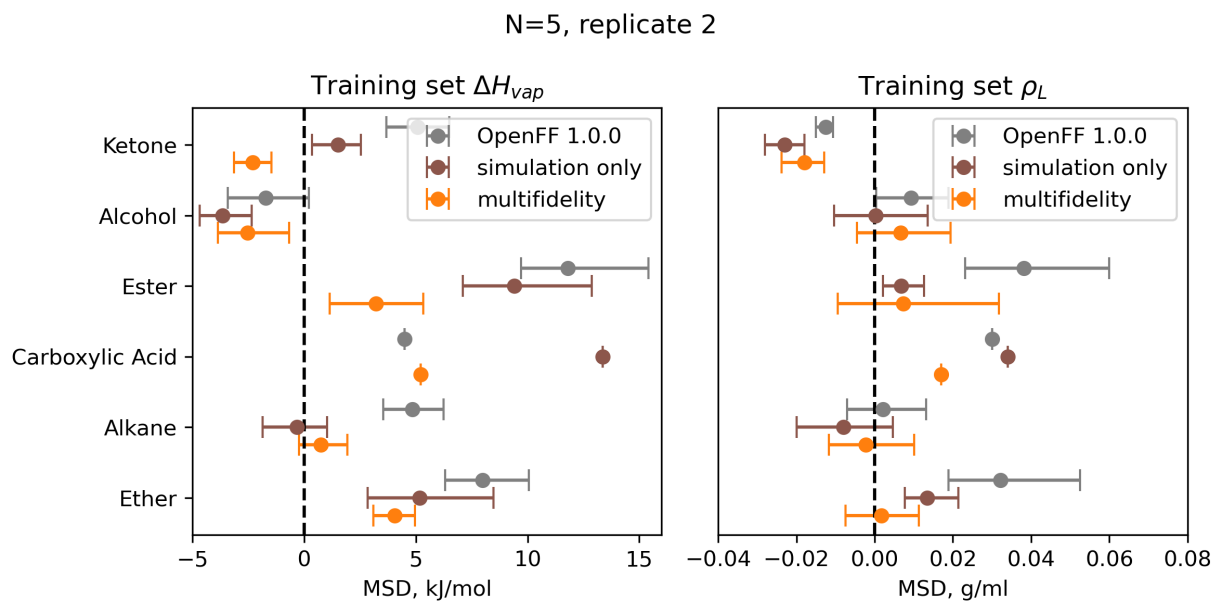

**Figure 6.** Bias in training set  $\Delta H_{vap}$  and  $\rho_L$ , as measured by the mean signed deviation (MSD), for OpenFF 1.0.0, simulation-only refit, and retrained parameters from  $N=5$  multi-fidelity run 2. Error bars represent bootstrapped 95% confidence intervals

### 2.1.3 Run 3

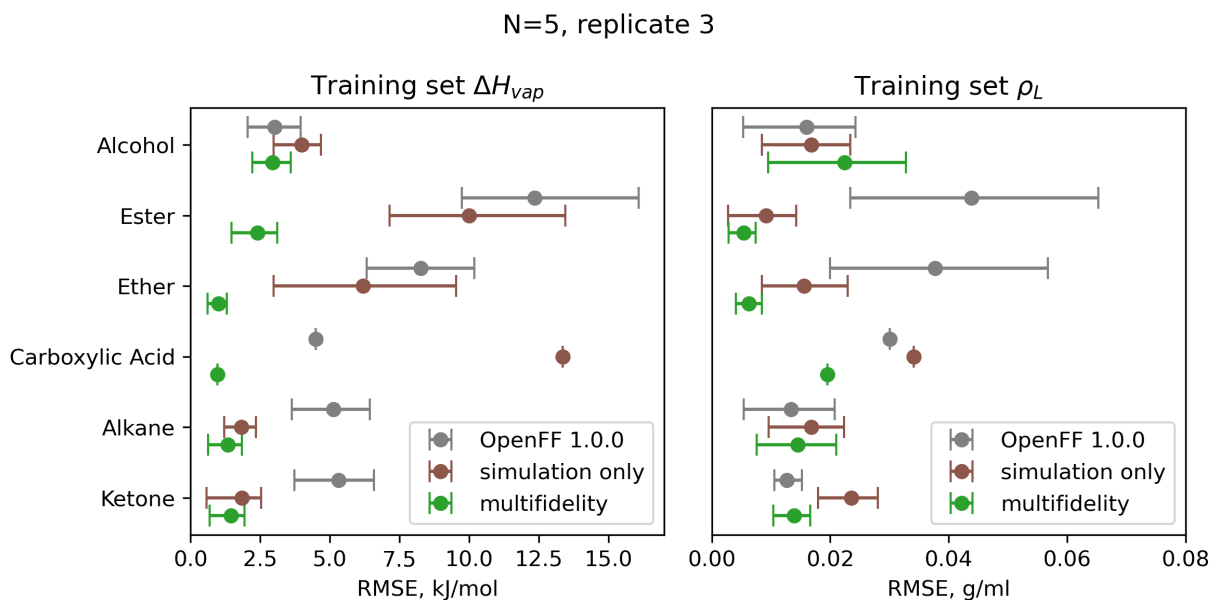

**Figure 7.** RMSE in training set  $\Delta H_{vap}$  and  $\rho_L$ , for OpenFF 1.0.0, simulation-only refit parameters, and retrained parameters from  $N=5$  initial points multi-fidelity run 3. Error bars represent bootstrapped 95% confidence intervals

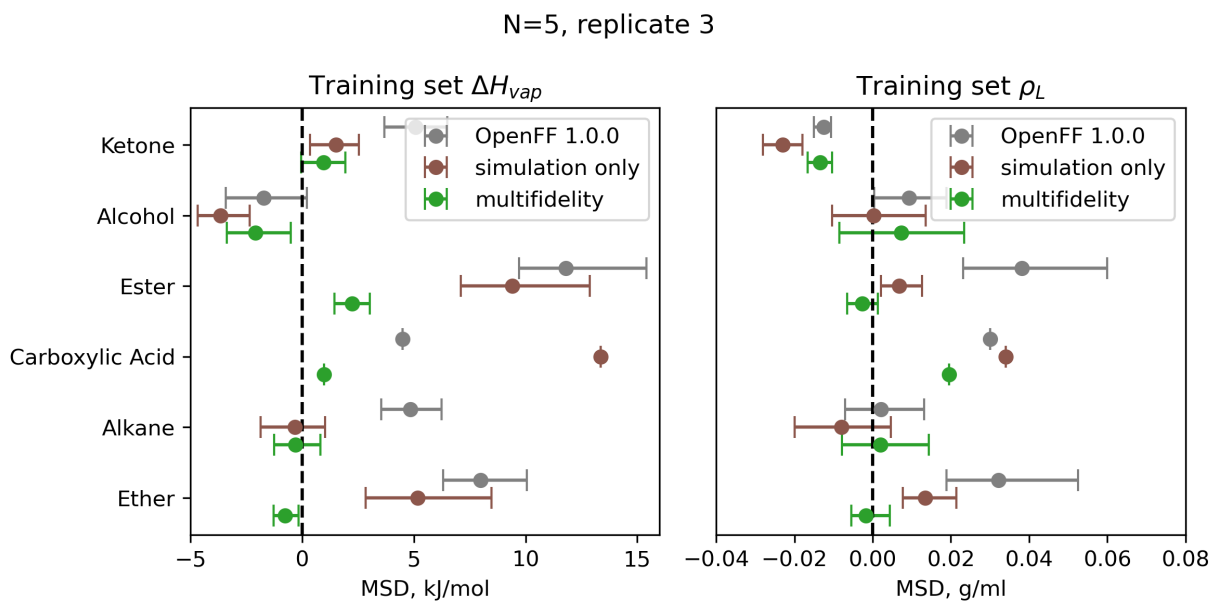

**Figure 8.** Bias in training set  $\Delta H_{vap}$  and  $\rho_L$ , as measured by the mean signed deviation (MSD), for OpenFF 1.0.0, simulation-only refit, and retrained parameters from  $N=5$  multi-fidelity run 3. Error bars represent bootstrapped 95% confidence intervals

## 2.1.4 Run 4

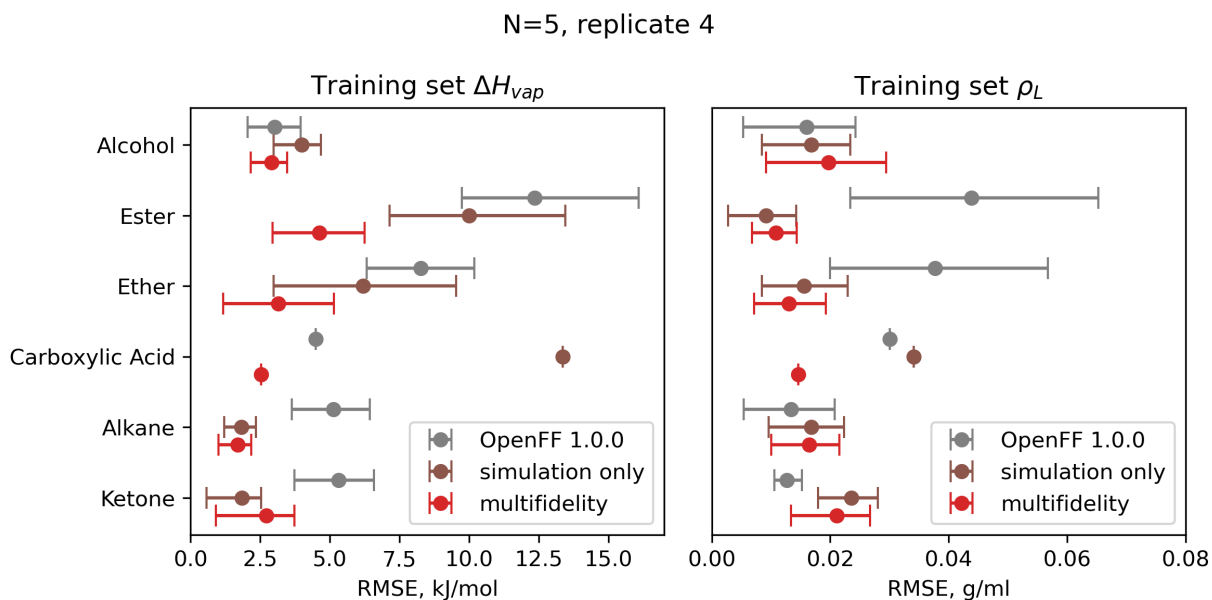

**Figure 9.** RMSE in training set  $\Delta H_{vap}$  and  $\rho_L$ , for OpenFF 1.0.0, simulation-only refit parameters, and retrained parameters from  $N=5$  initial points multi-fidelity run 4. Error bars represent bootstrapped 95% confidence intervals

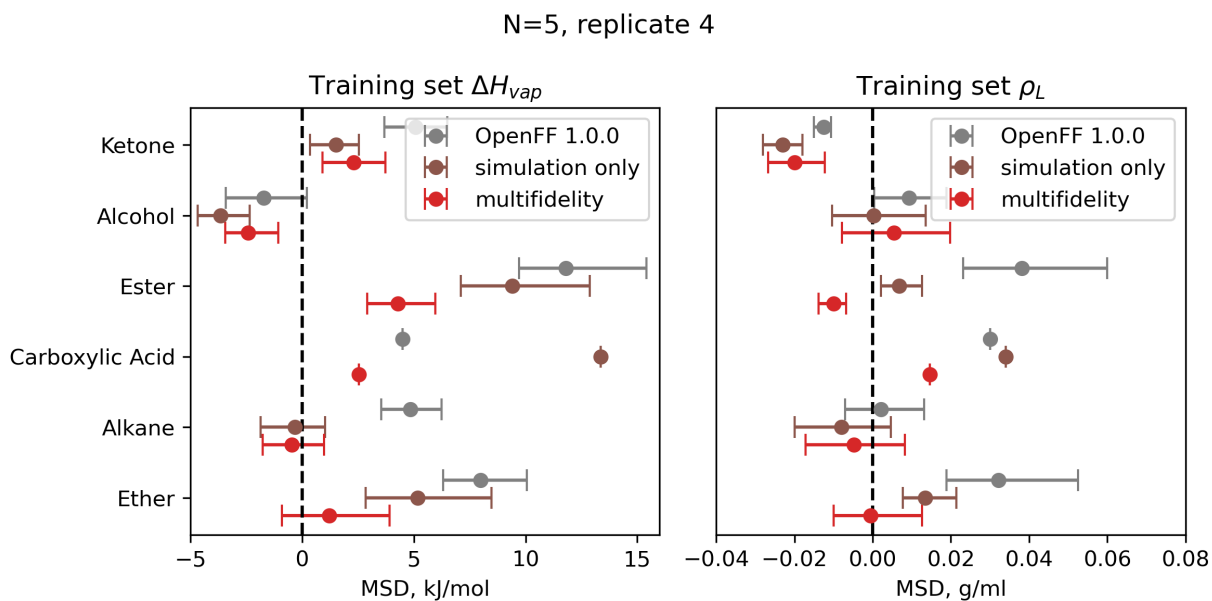

**Figure 10.** Bias in training set  $\Delta H_{vap}$  and  $\rho_L$ , as measured by the mean signed deviation (MSD), for OpenFF 1.0.0, simulation-only refit, and retrained parameters from  $N=5$  multi-fidelity run 4. Error bars represent bootstrapped 95% confidence intervals

2.1.5 Run 5

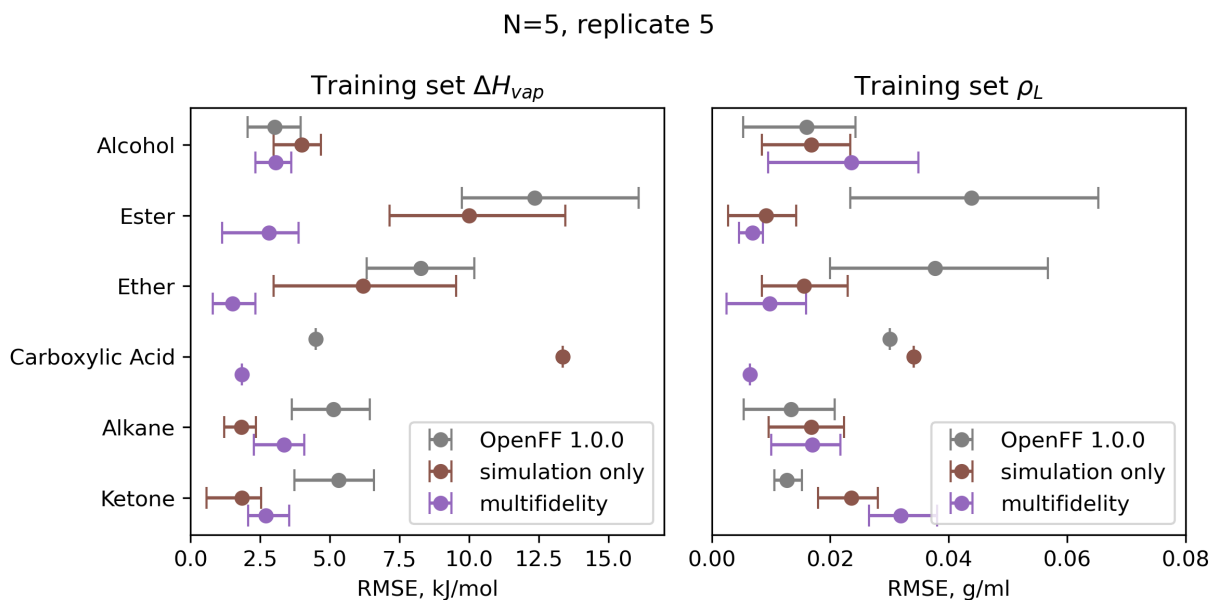

**Figure 11.** RMSE in training set  $\Delta H_{vap}$  and  $\rho_L$ , for OpenFF 1.0.0, simulation-only refit parameters, and retrained parameters from  $N=5$  initial points multi-fidelity run 5. Error bars represent bootstrapped 95% confidence intervals

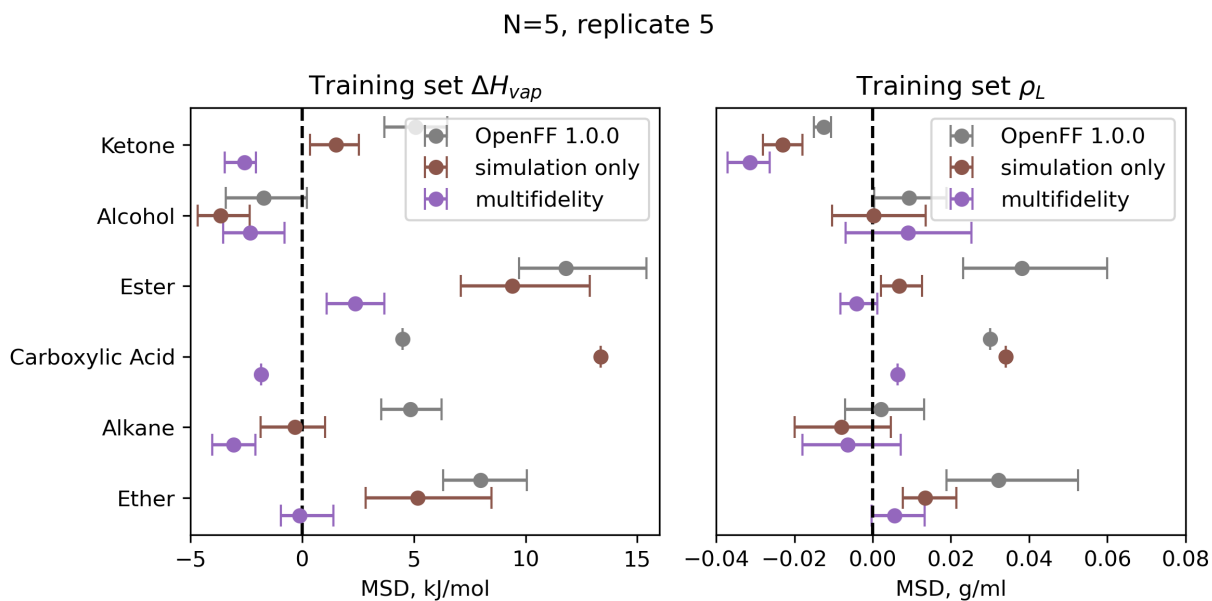

**Figure 12.** Bias in training set  $\Delta H_{vap}$  and  $\rho_L$ , as measured by the mean signed deviation (MSD), for OpenFF 1.0.0, simulation-only refit, and retrained parameters from  $N=5$  multi-fidelity run 5. Error bars represent bootstrapped 95% confidence intervals



## 2.2 "Pure only" optimization, $N=10$

### 2.2.1 Run 1

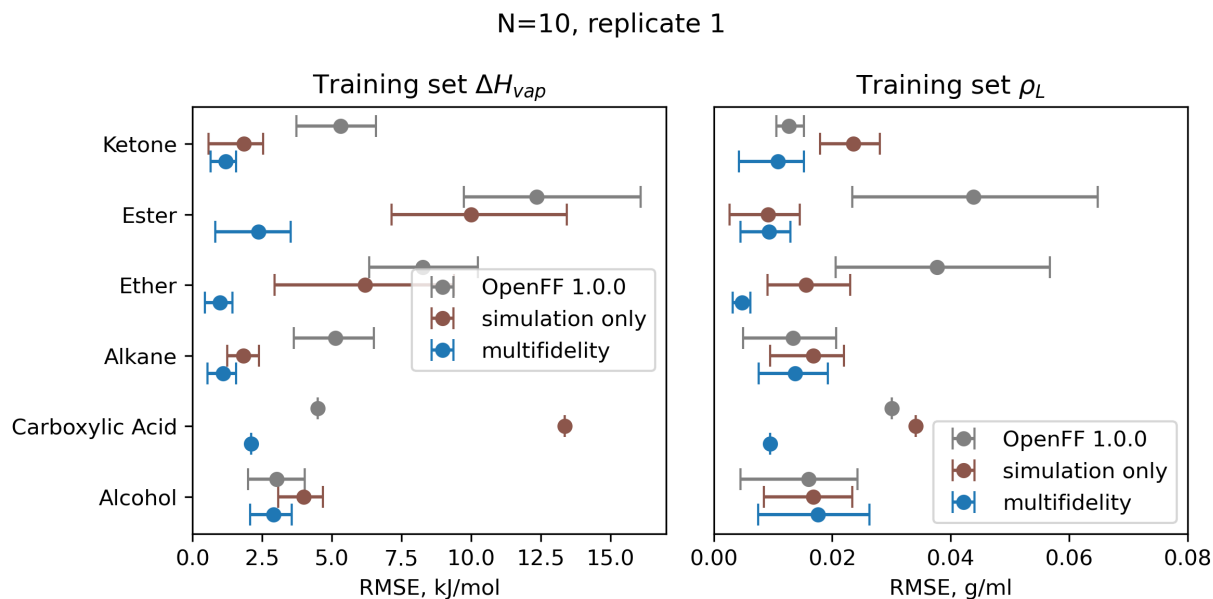

**Figure 13.** RMSE in training set  $\Delta H_{vap}$  and  $\rho_L$  for OpenFF 1.0.0, simulation-only refit parameters, and retrained parameters from  $N=10$  initial points multi-fidelity run 1. Error bars represent bootstrapped 95% confidence intervals

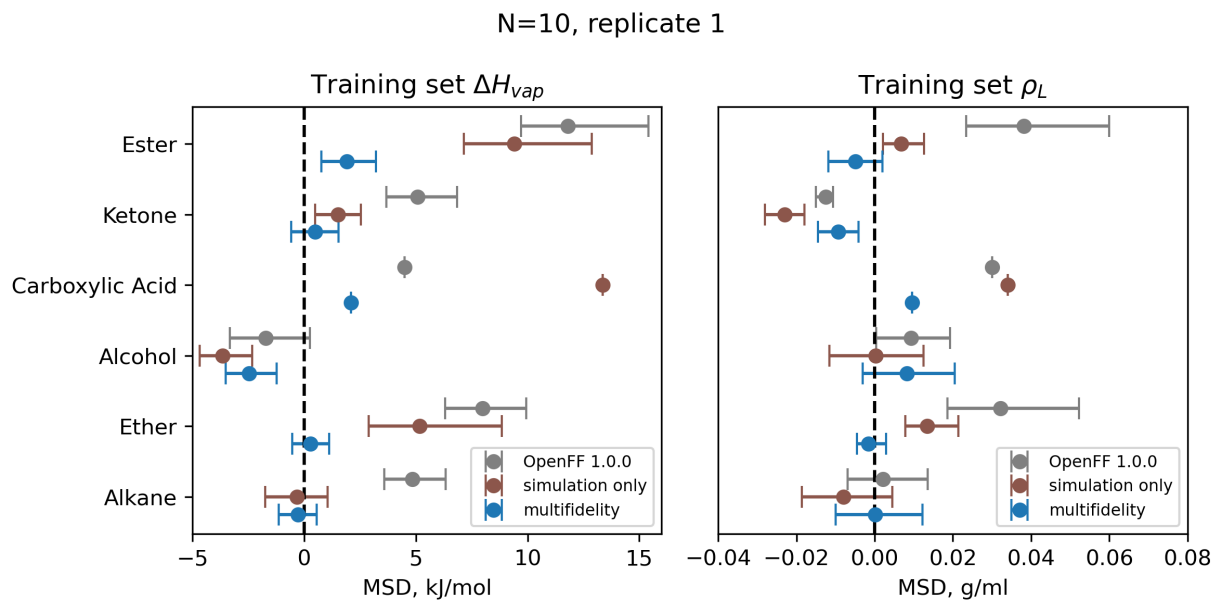

**Figure 14.** Bias in training set  $\Delta H_{vap}$  and  $\rho_L$ , as measured by the mean signed deviation (MSD), for OpenFF 1.0.0, simulation-only refit, and retrained parameters from  $N=10$  multi-fidelity run 1. Error bars represent bootstrapped 95% confidence intervals

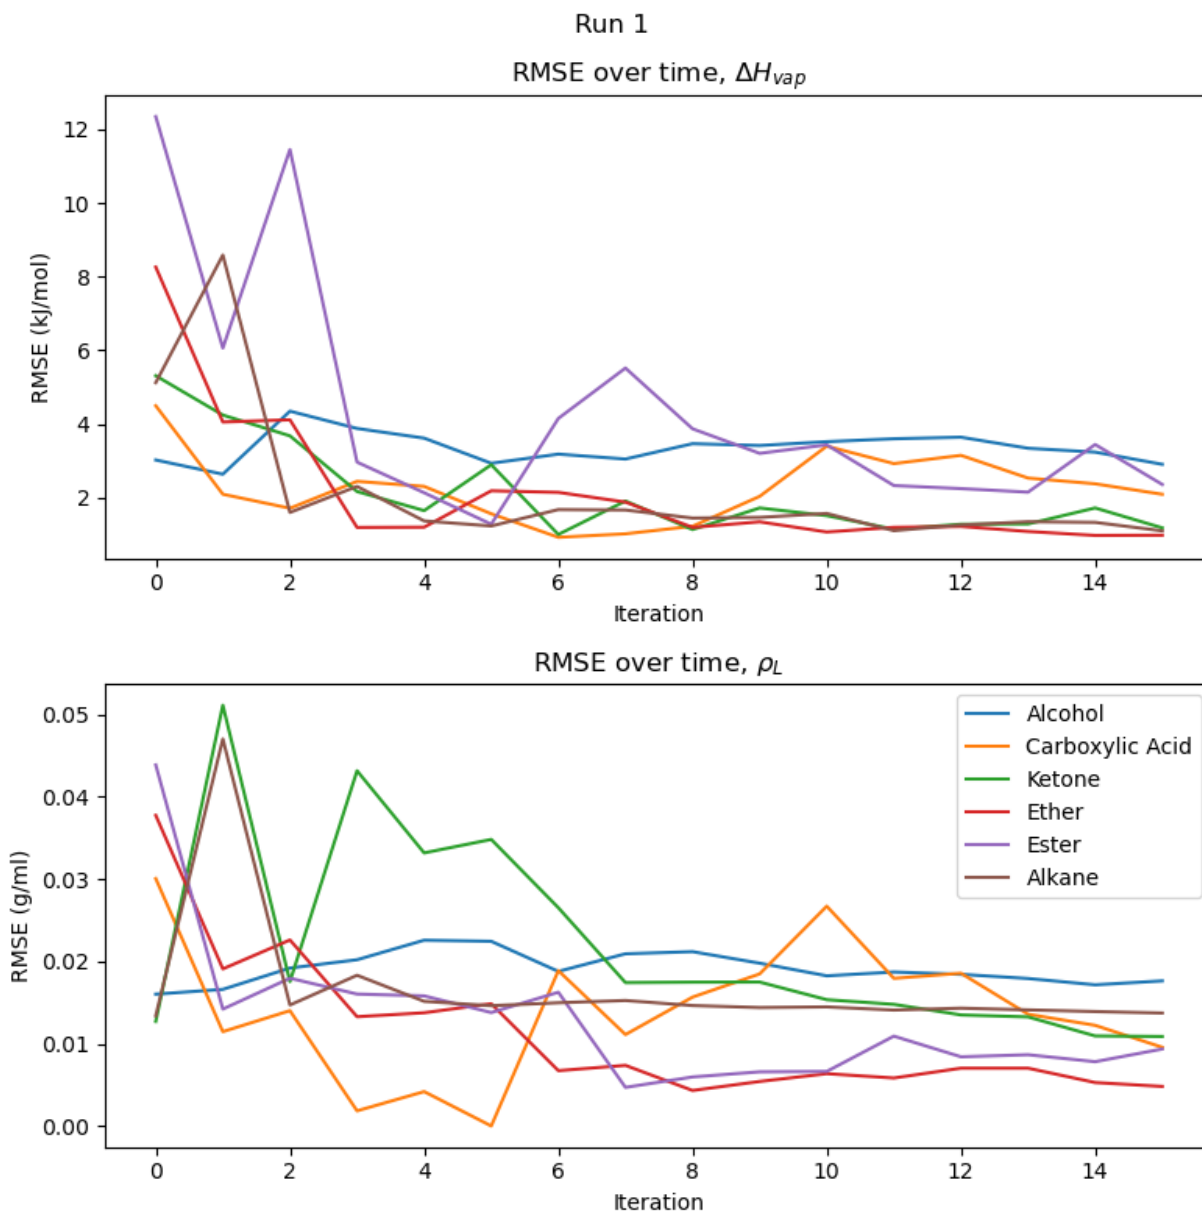

**Figure 15.** Per-moiety training set RMSE at each accepted optimization step, for  $N=10$  multi-fidelity run 1.

## 2.2.2 Run 2

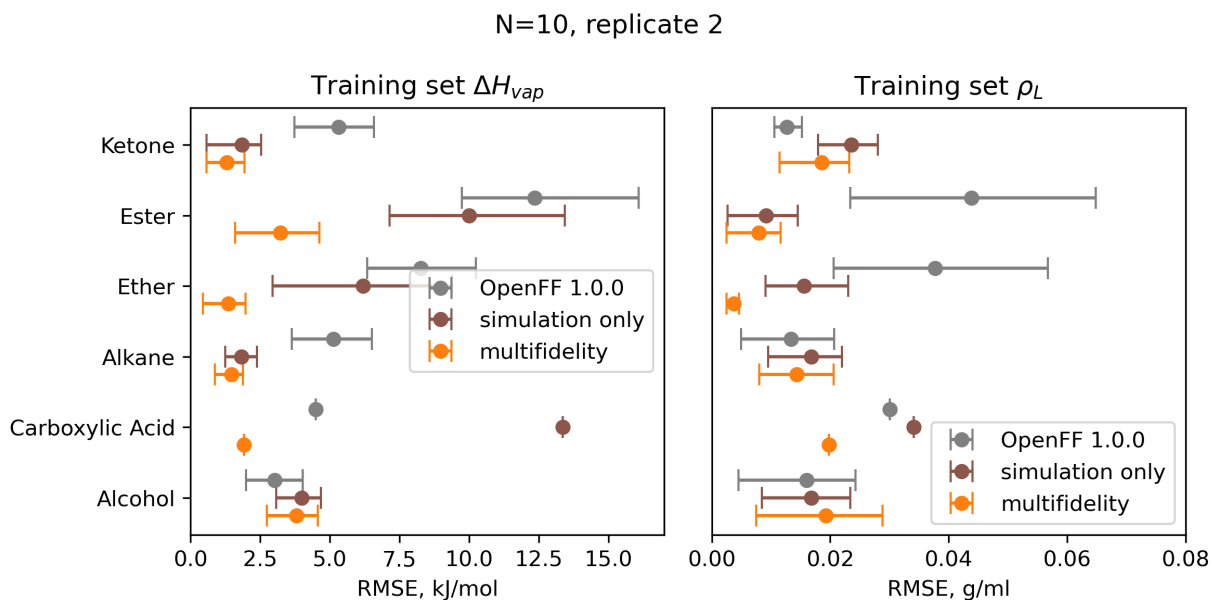

**Figure 16.** RMSE in training set  $\Delta H_{vap}$  and  $\rho_L$ , for OpenFF 1.0.0, simulation-only refit parameters, and retrained parameters from  $N=10$  initial points multi-fidelity run 2. Error bars represent bootstrapped 95% confidence intervals

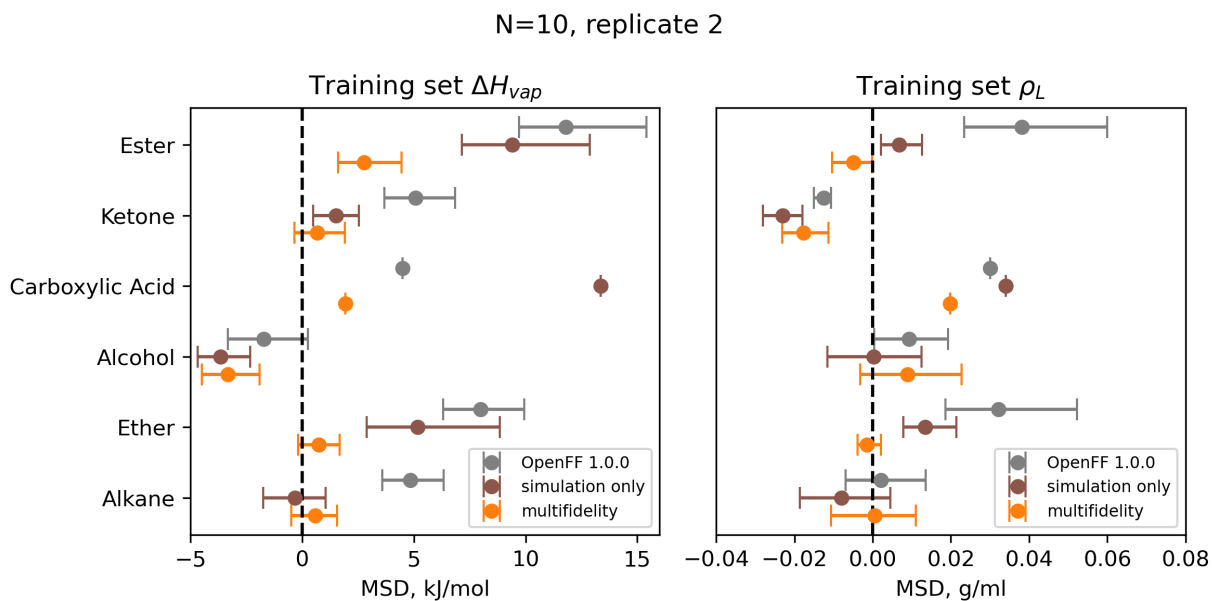

**Figure 17.** Bias in training set  $\Delta H_{vap}$  and  $\rho_L$ , as measured by the mean signed deviation (MSD), for OpenFF 1.0.0, simulation-only refit, and retrained parameters from  $N=10$  multi-fidelity run 2. Error bars represent bootstrapped 95% confidence intervals

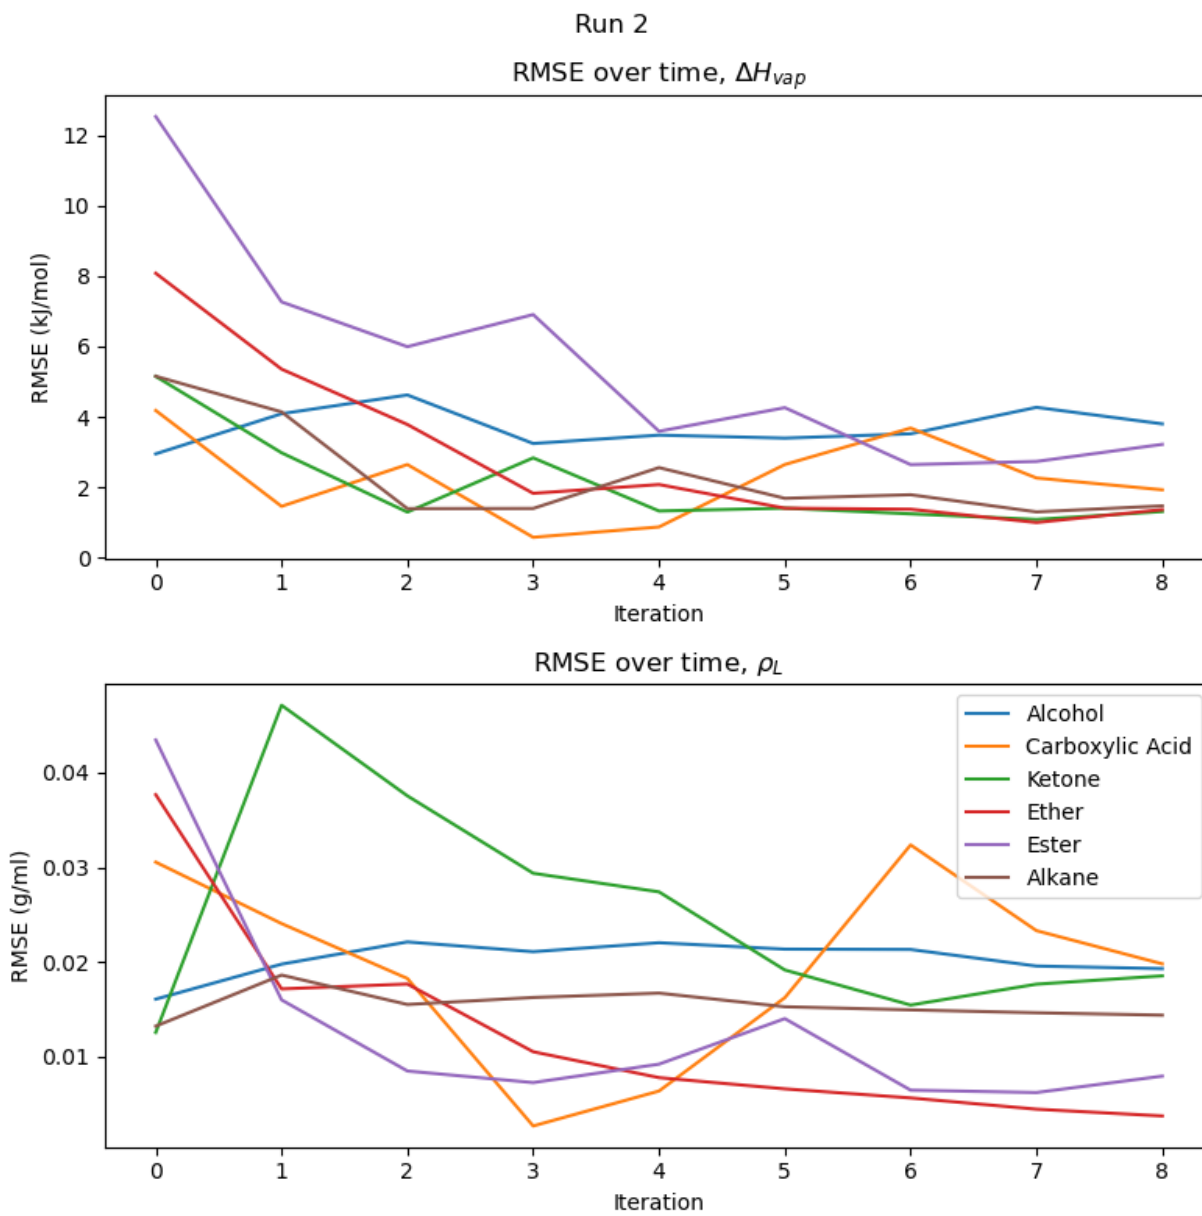

**Figure 18.** Per-moiety training set RMSE at each accepted optimization step, for  $N=10$  multi-fidelity run 2.

### 2.2.3 Run 3

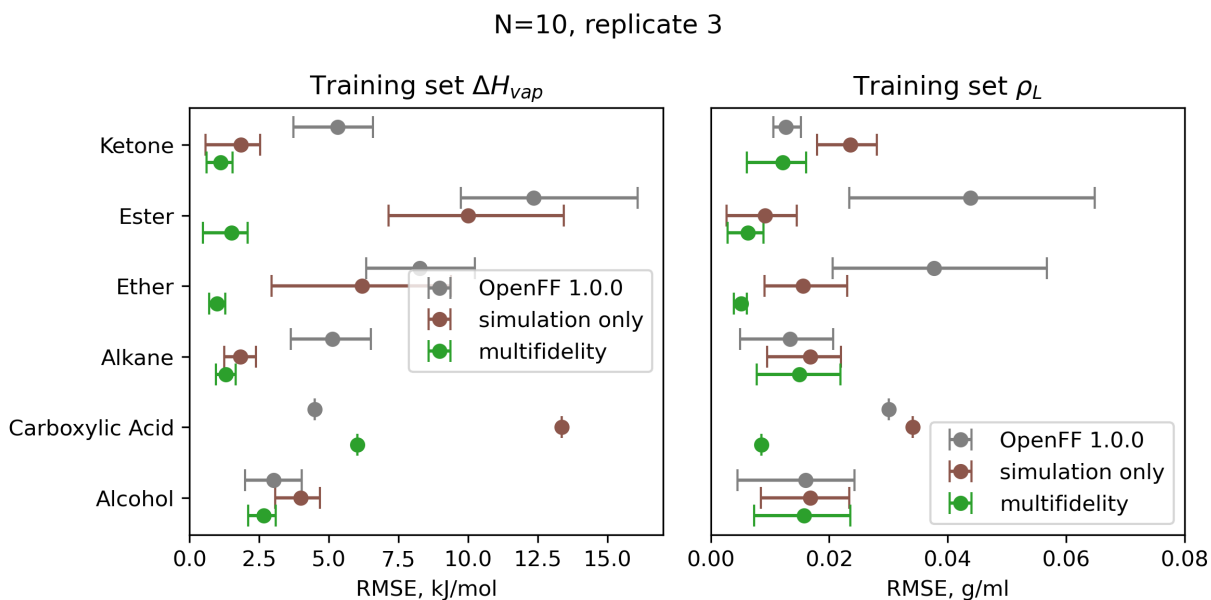

**Figure 19.** RMSE in training set  $\Delta H_{vap}$  and  $\rho_L$ , for OpenFF 1.0.0, simulation-only refit parameters, and retrained parameters from  $N=10$  initial points multi-fidelity run 3. Error bars represent bootstrapped 95% confidence intervals

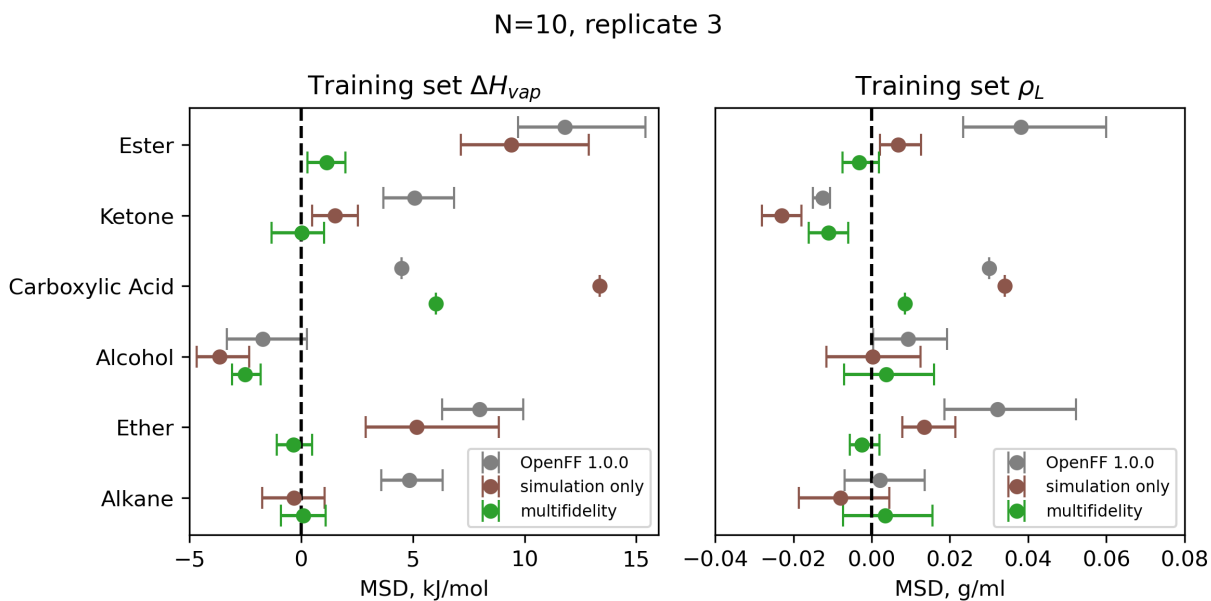

**Figure 20.** Bias in training set  $\Delta H_{vap}$  and  $\rho_L$ , as measured by the mean signed deviation (MSD), for OpenFF 1.0.0, simulation-only refit, and retrained parameters from  $N=10$  multi-fidelity run 3. Error bars represent bootstrapped 95% confidence intervals

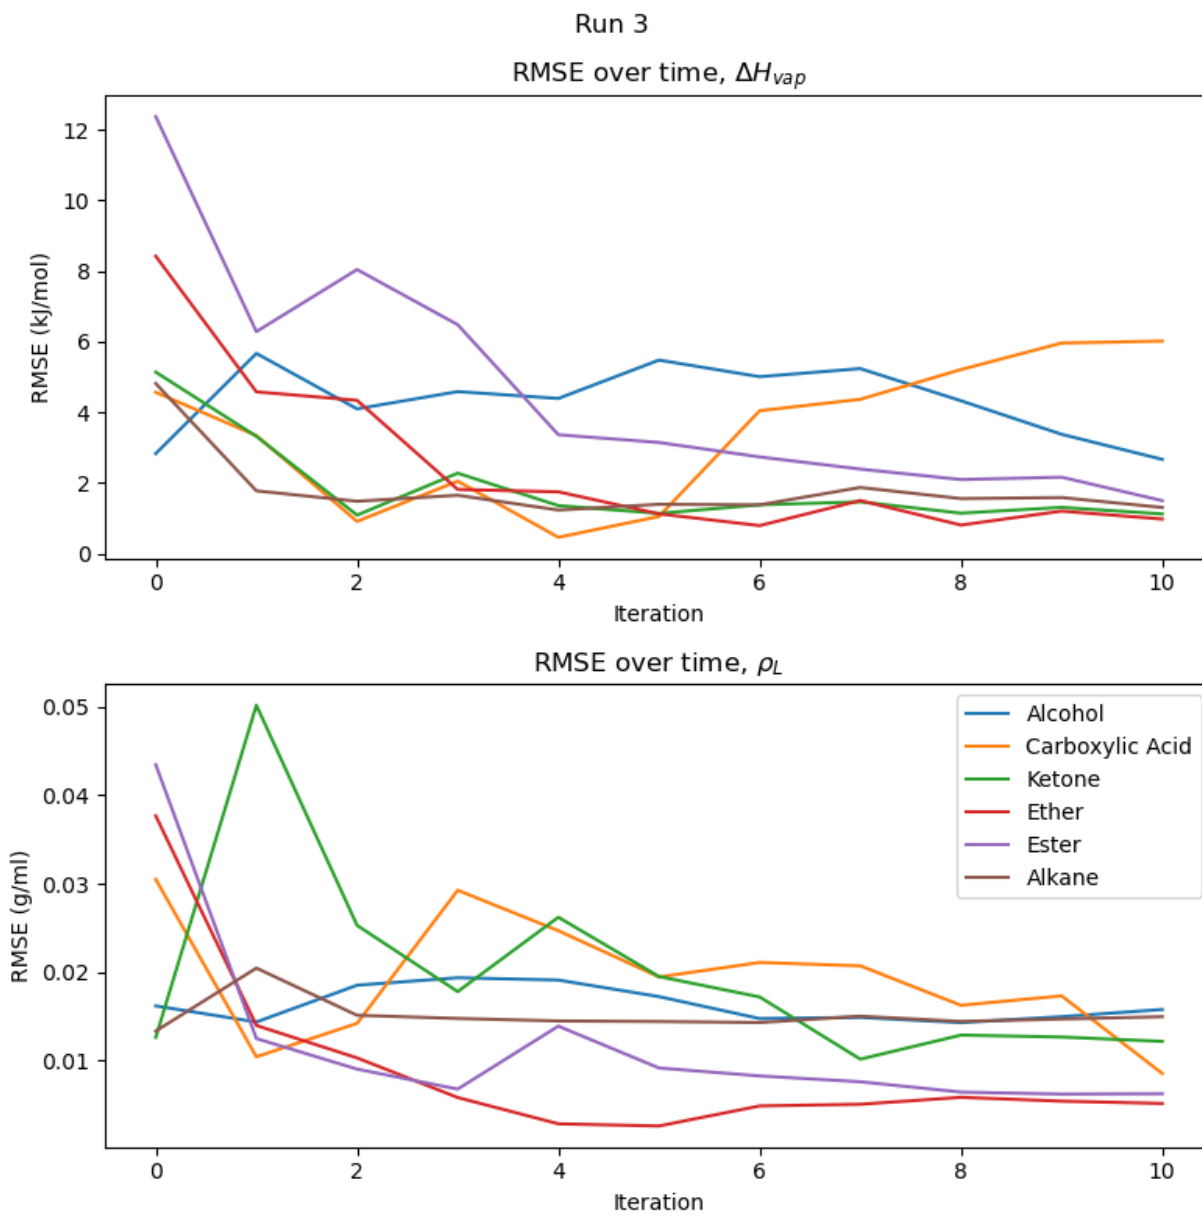

**Figure 21.** Per-moiety training set RMSE at each accepted optimization step, for  $N=10$  multi-fidelity run 3.

## 2.2.4 Run 4

N=10, replicate 4

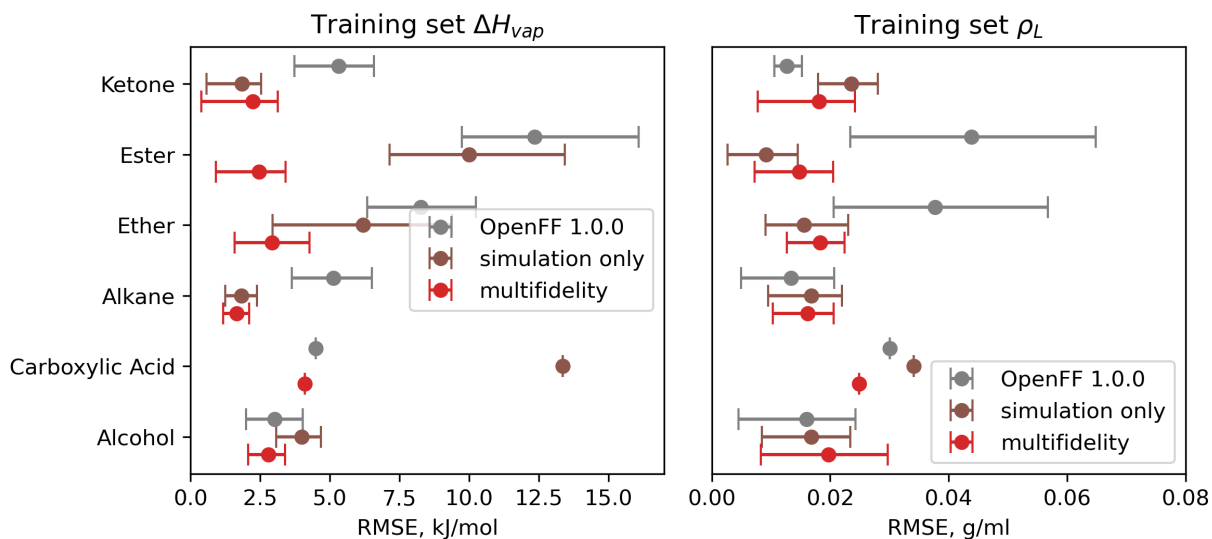

**Figure 22.** RMSE in training set  $\Delta H_{vap}$  and  $\rho_L$ , for OpenFF 1.0.0, simulation-only refit parameters, and retrained parameters from  $N=10$  initial points multi-fidelity run 4. Error bars represent bootstrapped 95% confidence intervals

N=10, replicate 4

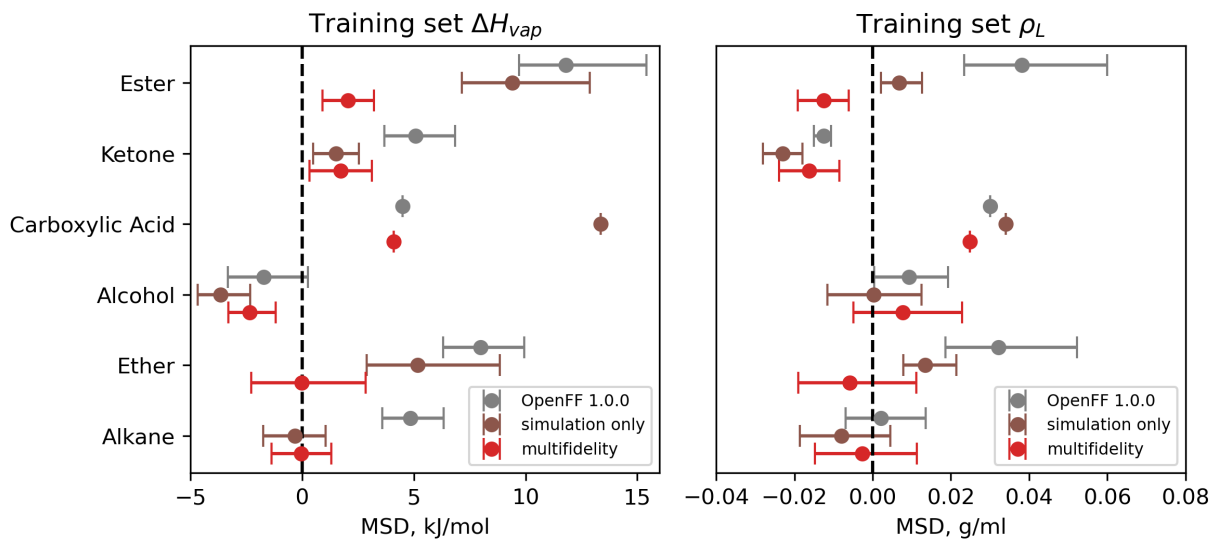

**Figure 23.** Bias in training set  $\Delta H_{vap}$  and  $\rho_L$ , as measured by the mean signed deviation (MSD), for OpenFF 1.0.0, simulation-only refit, and retrained parameters from  $N=10$  multi-fidelity run 4. Error bars represent bootstrapped 95% confidence intervals

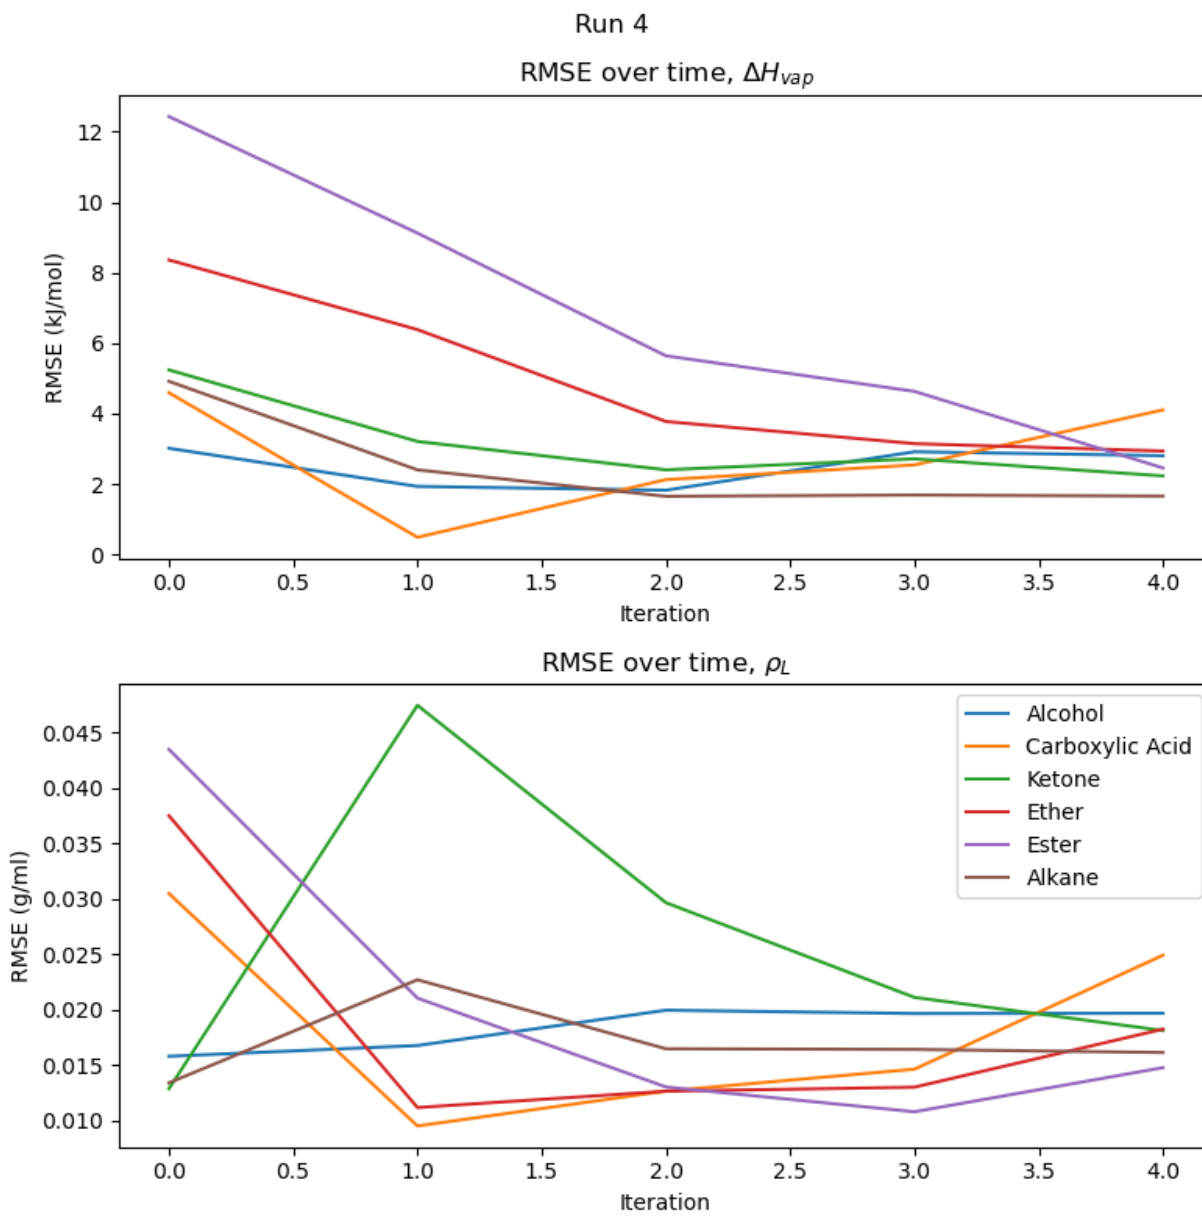

**Figure 24.** Per-moiety training set RMSE at each accepted optimization step, for  $N=10$  multi-fidelity run 4.



## 2.2.5 Run 5

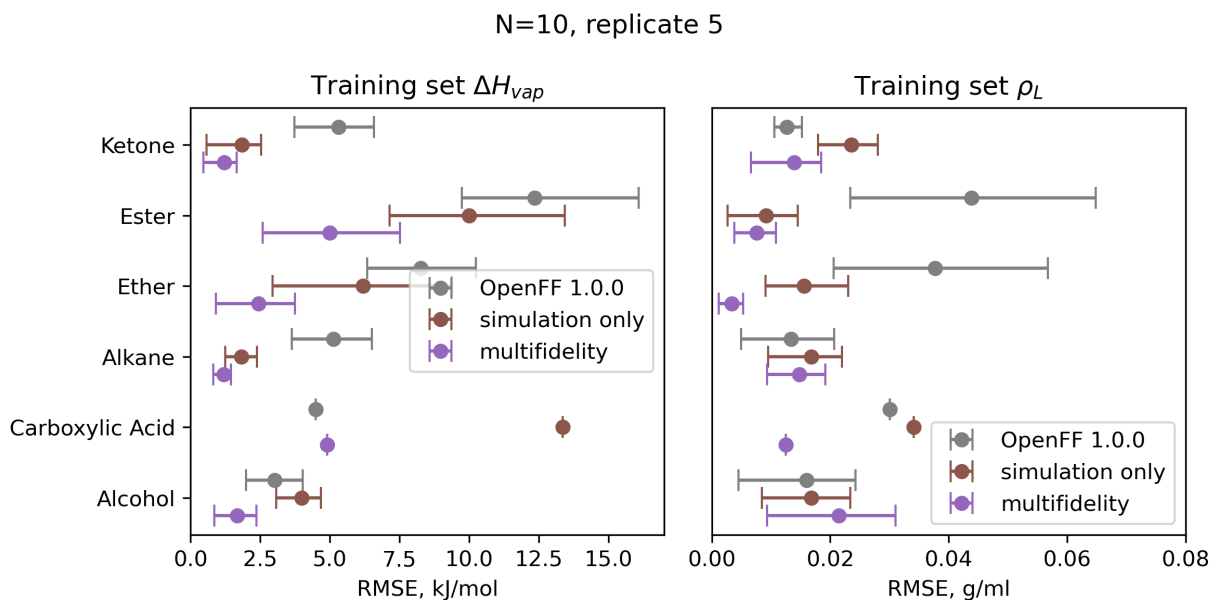

**Figure 25.** RMSE in training set  $\Delta H_{vap}$  and  $\rho_L$ , for OpenFF 1.0.0, simulation-only refit parameters, and retrained parameters from  $N=10$  initial points multi-fidelity run 5. Error bars represent bootstrapped 95% confidence intervals

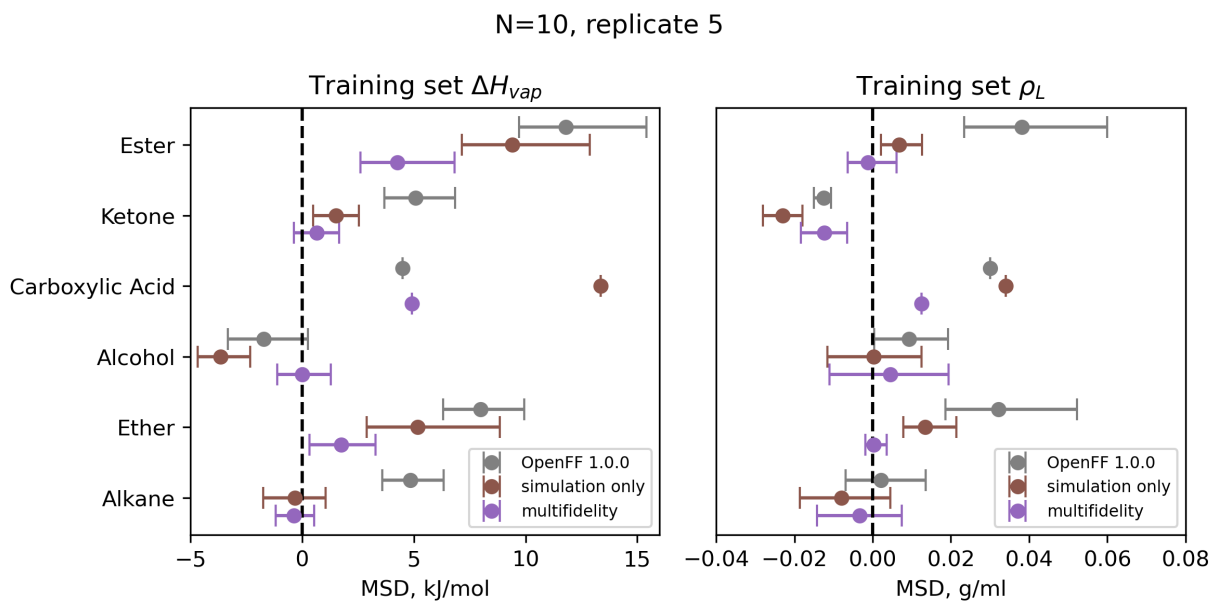

**Figure 26.** Bias in training set  $\Delta H_{vap}$  and  $\rho_L$ , as measured by the mean signed deviation (MSD), for OpenFF 1.0.0, simulation-only refit, and retrained parameters from  $N=10$  multi-fidelity run 5. Error bars represent bootstrapped 95% confidence intervals

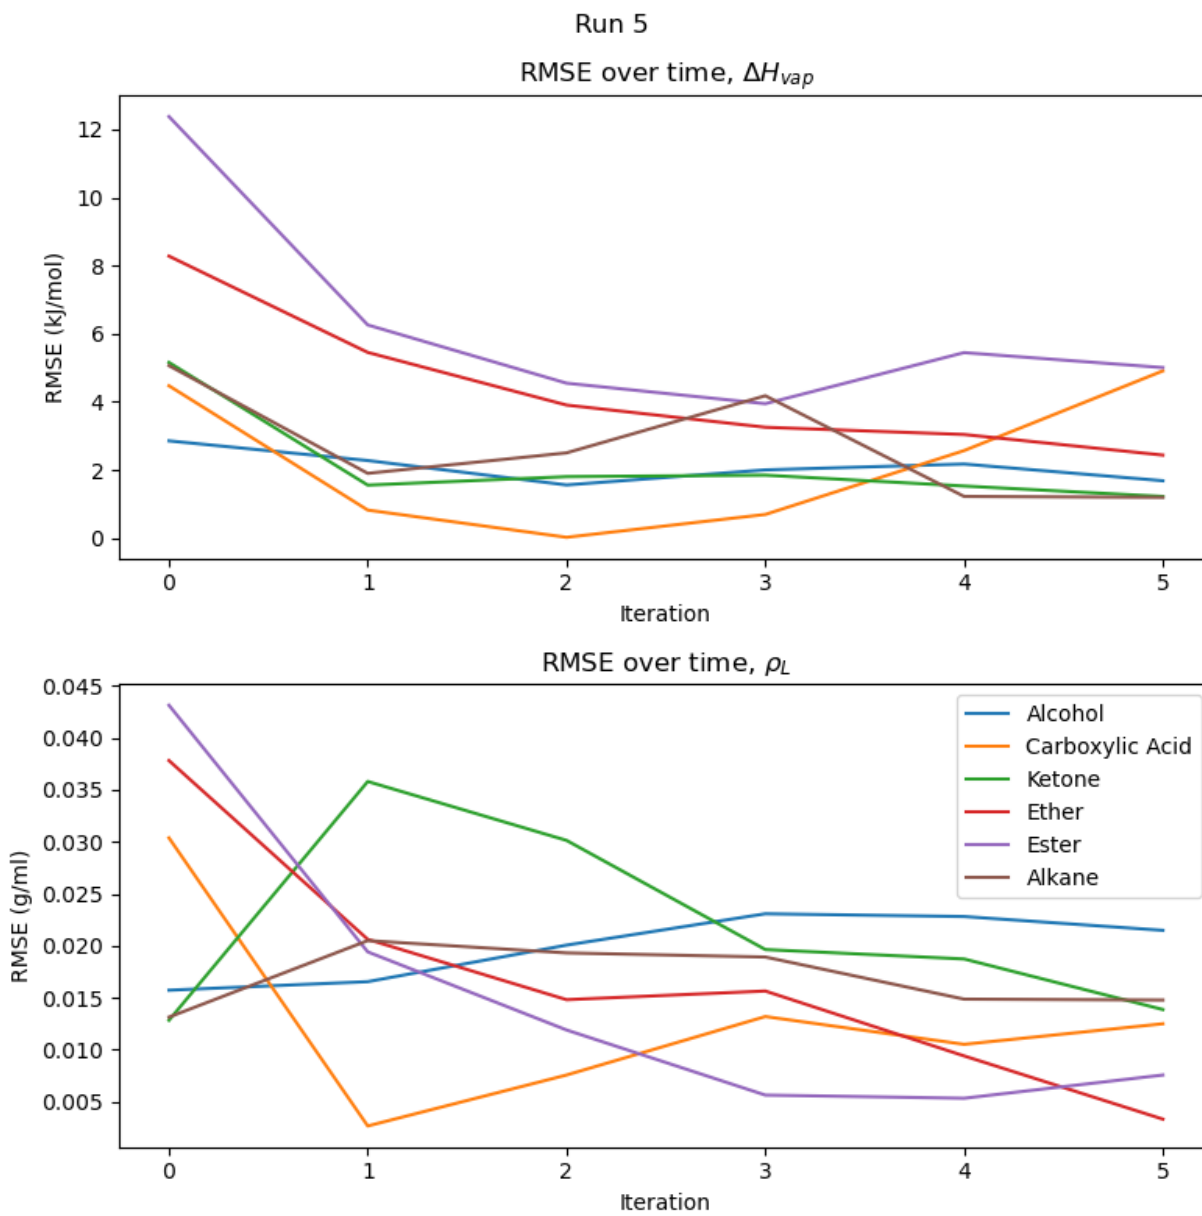

**Figure 27.** Per-moiety training set RMSE at each accepted optimization step, for  $N=10$  multi-fidelity run 5.

### 2.3 "Mixture only" optimization, N=10

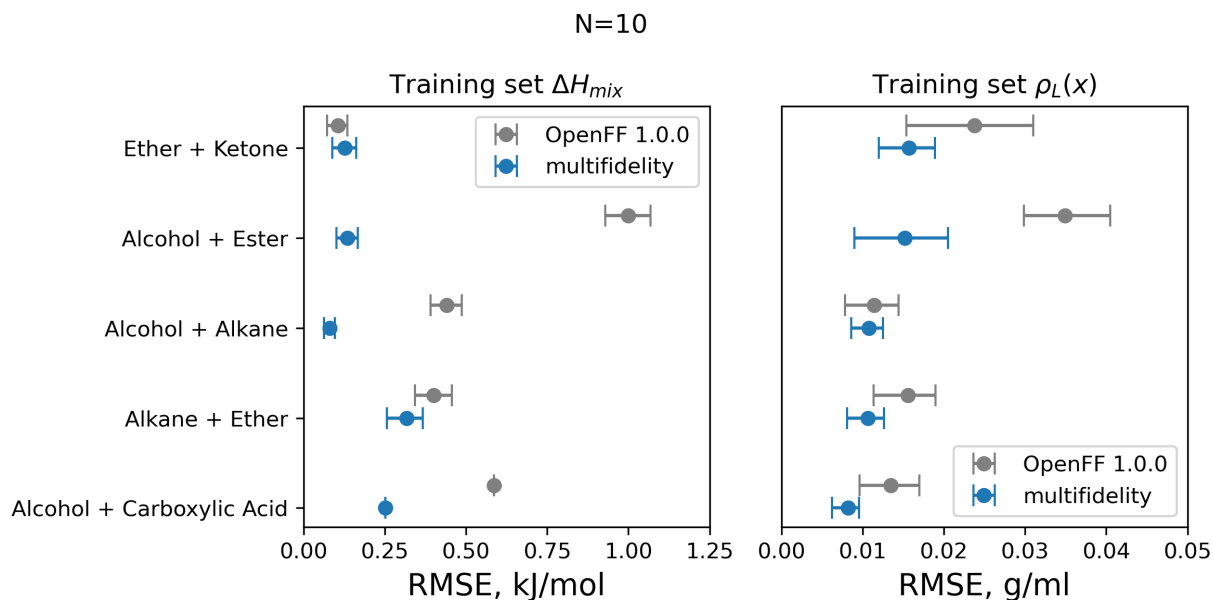

**Figure 28.** RMSE in training set  $\Delta H_{mix}$  and  $\rho_L(x)$ , for OpenFF 1.0.0 and retrained parameters from  $N=10$  initial points multi-fidelity optimization against "mixture-only" training set. Error bars represent bootstrapped 95% confidence intervals

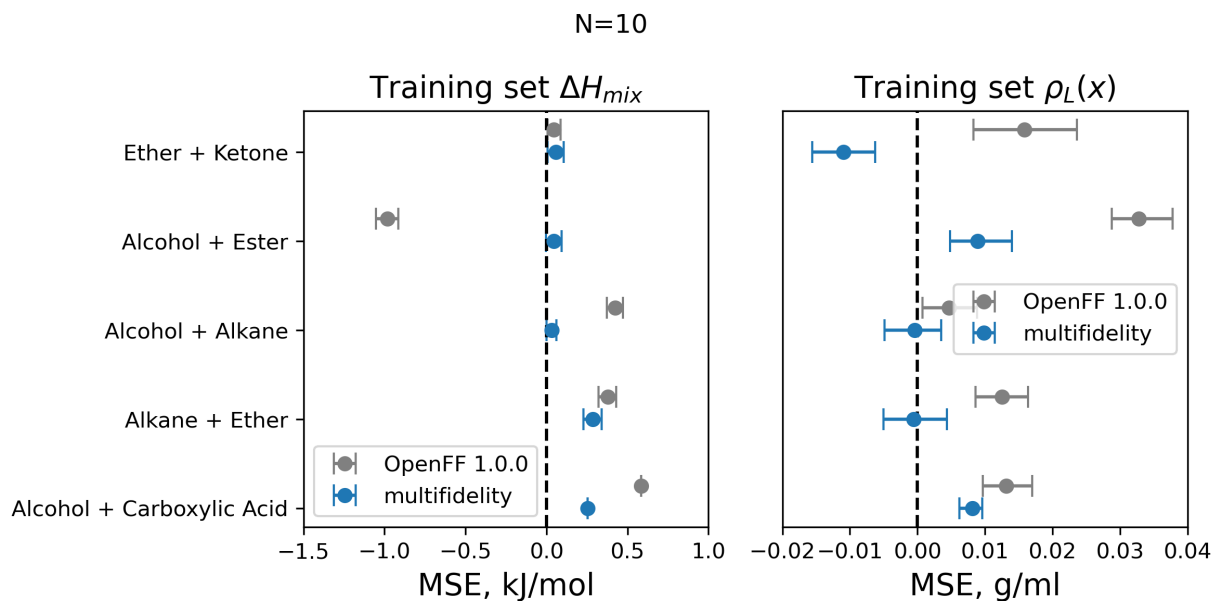

**Figure 29.** Bias in training set  $\Delta H_{mix}$  and  $\rho_L(x)$ , as measured by the mean signed deviation (MSD), for OpenFF 1.0.0 and retrained parameters from  $N=10$  multi-fidelity optimization against "mixture-only" training set. Error bars represent bootstrapped 95% confidence intervals

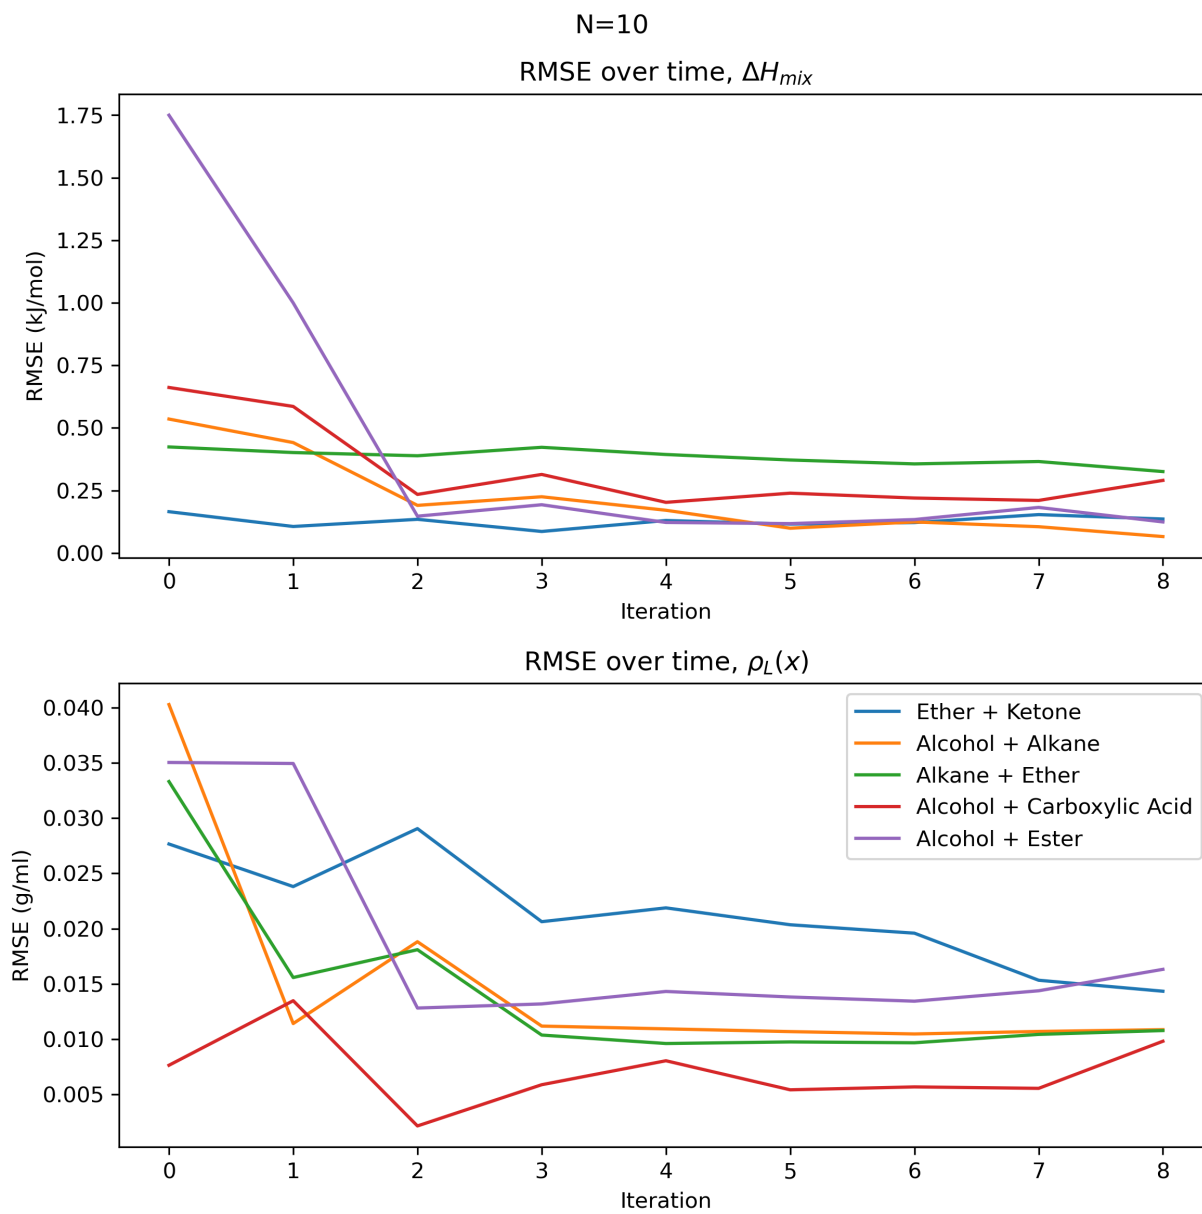

**Figure 30.** Per-moiety training set RMSE at each accepted optimization step, for  $N=10$  multi-fidelity optimization against “mixture-only” training set.

## 2.4 "Mixture Only" optimization, N=20

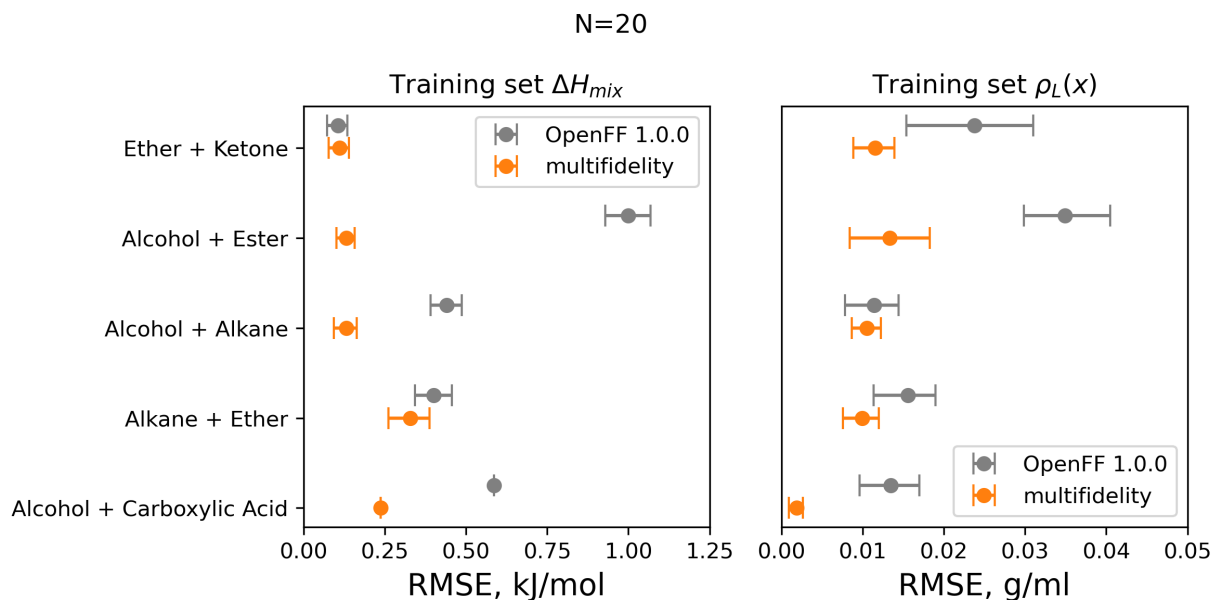

**Figure 31.** RMSE in training set  $\Delta H_{mix}$  and  $\rho_L(x)$ , for OpenFF 1.0.0 and retrained parameters from  $N=20$  initial points multi-fidelity optimization against "mixture-only" training set. Error bars represent bootstrapped 95% confidence intervals

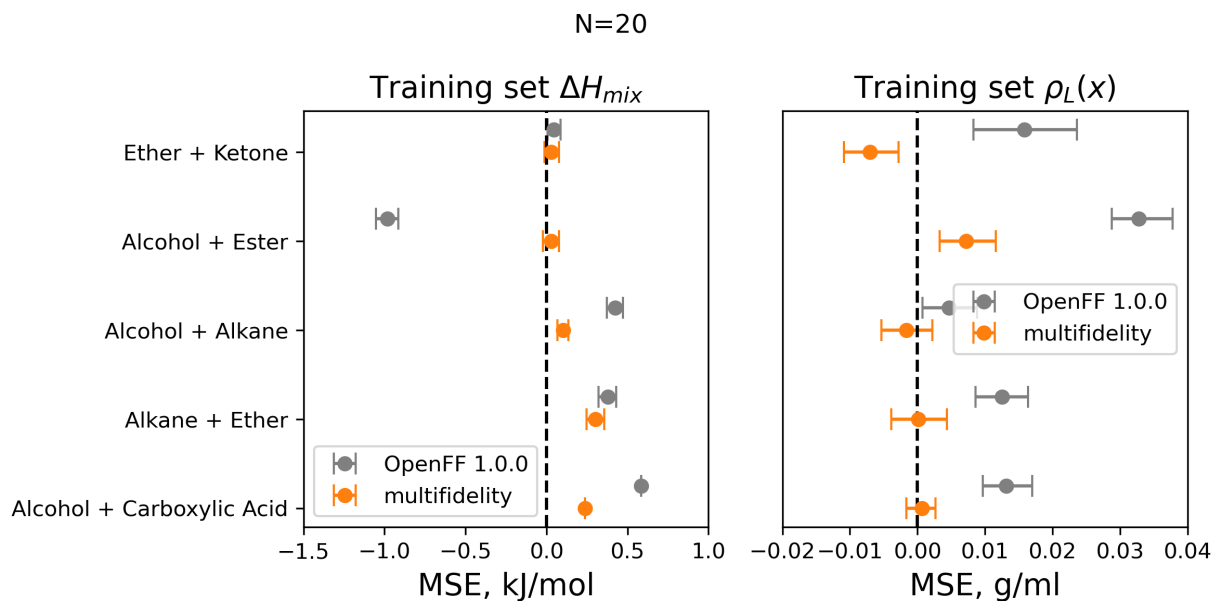

**Figure 32.** Bias in training set  $\Delta H_{mix}$  and  $\rho_L(x)$ , as measured by the mean signed deviation (MSD), for OpenFF 1.0.0 and retrained parameters from  $N=20$  multi-fidelity optimization against "mixture-only" training set. Error bars represent bootstrapped 95% confidence intervals

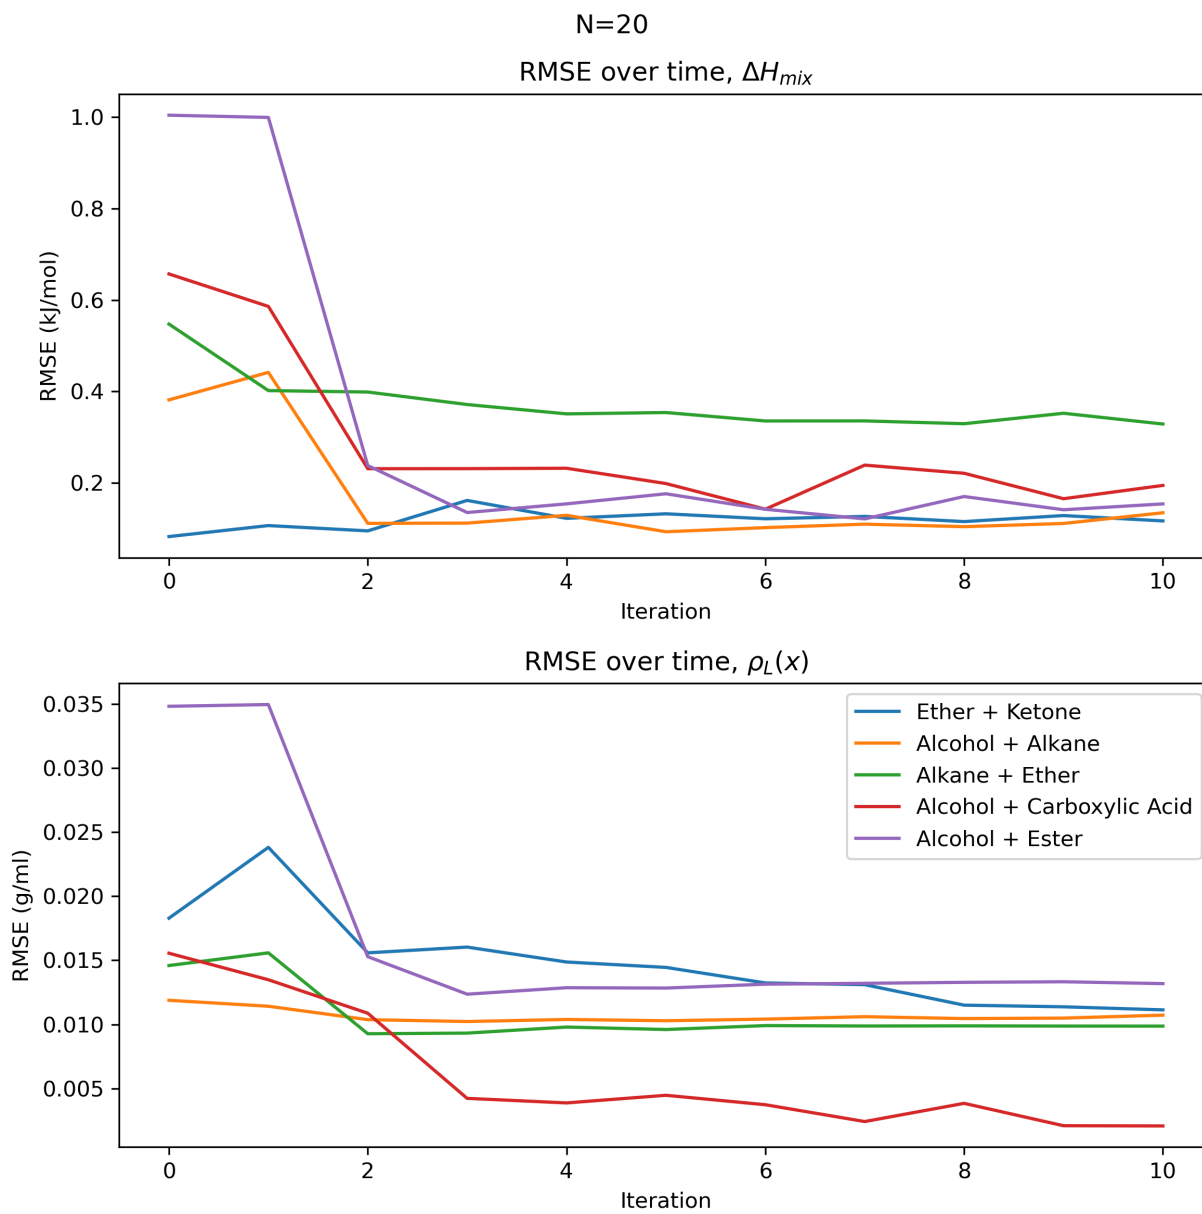

**Figure 33.** Per-moiety training set RMSE at each accepted optimization step, for  $N=20$  multi-fidelity optimization against “mixture-only” training set.

### 3 Test set performance

#### 3.1 "Pure only", N=10

##### 3.1.1 Run 1

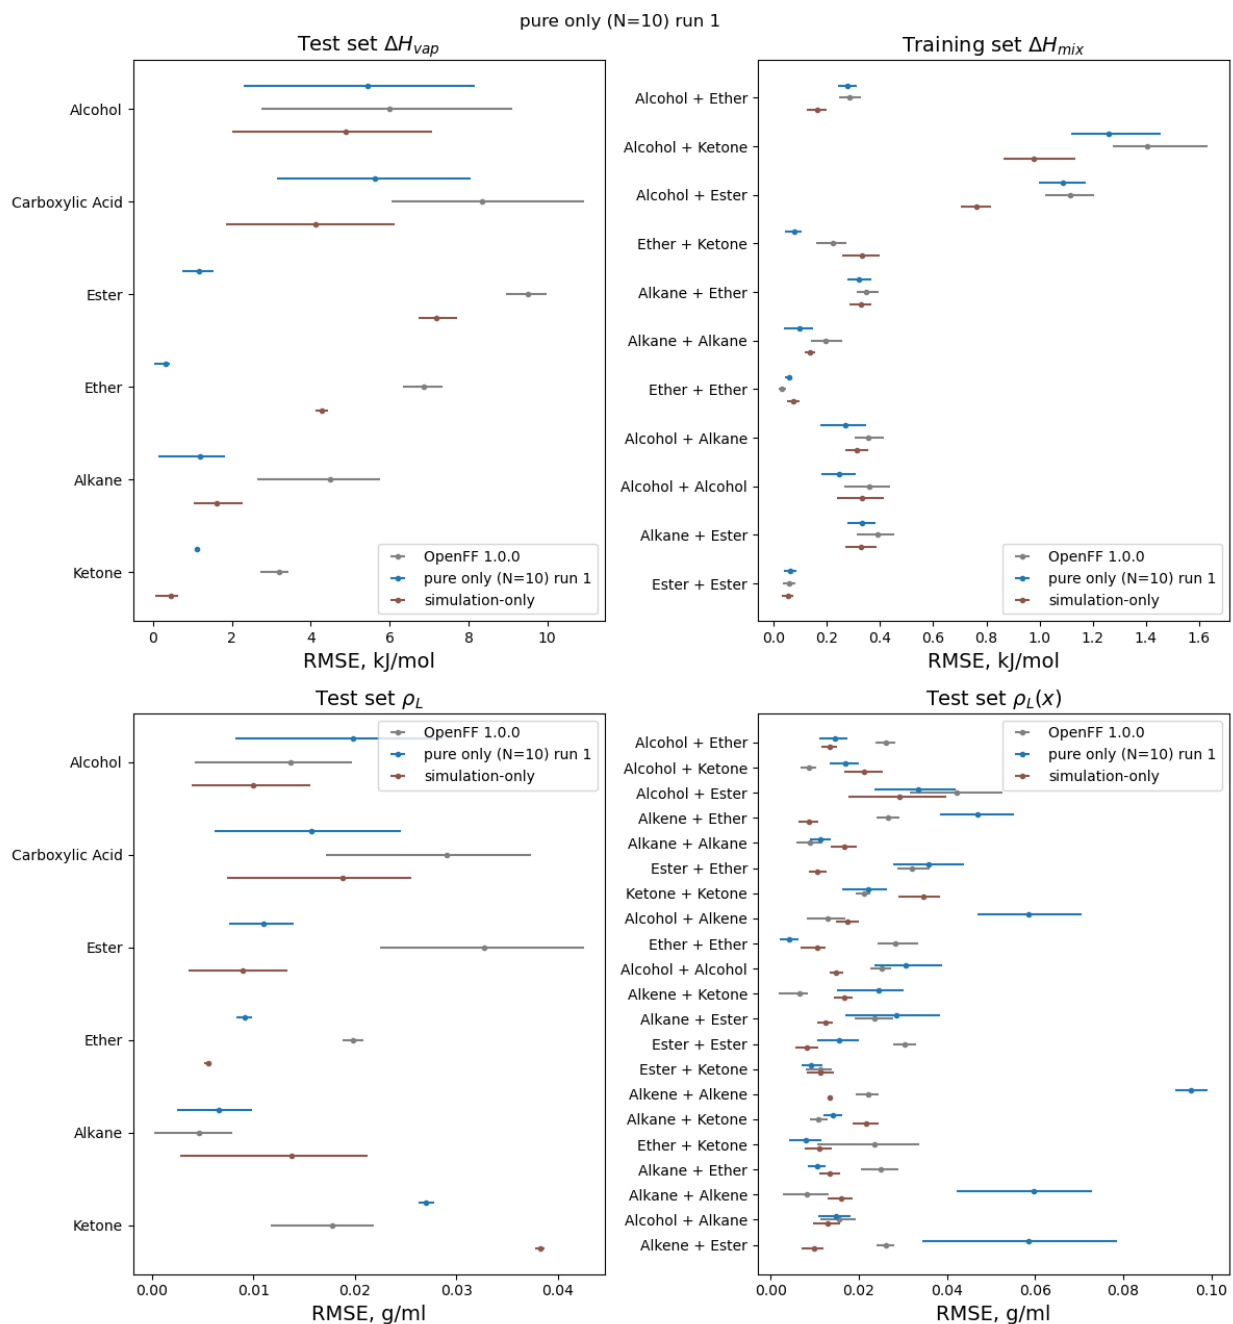

**Figure 34.** Benchmark RMSE over the four types of physical property data in the test set, split by function group or functional group mixture. RMSEs plotted for OpenFF 1.0.0 (gray), multi-fidelity N=10 run 1 against the "pure only" training set (blue), and the simulation-only optimization against the same training set (brown). Error bars represent 95% confidence intervals, bootstrapped over the properties in the dataset.

### 3.1.2 Run 2

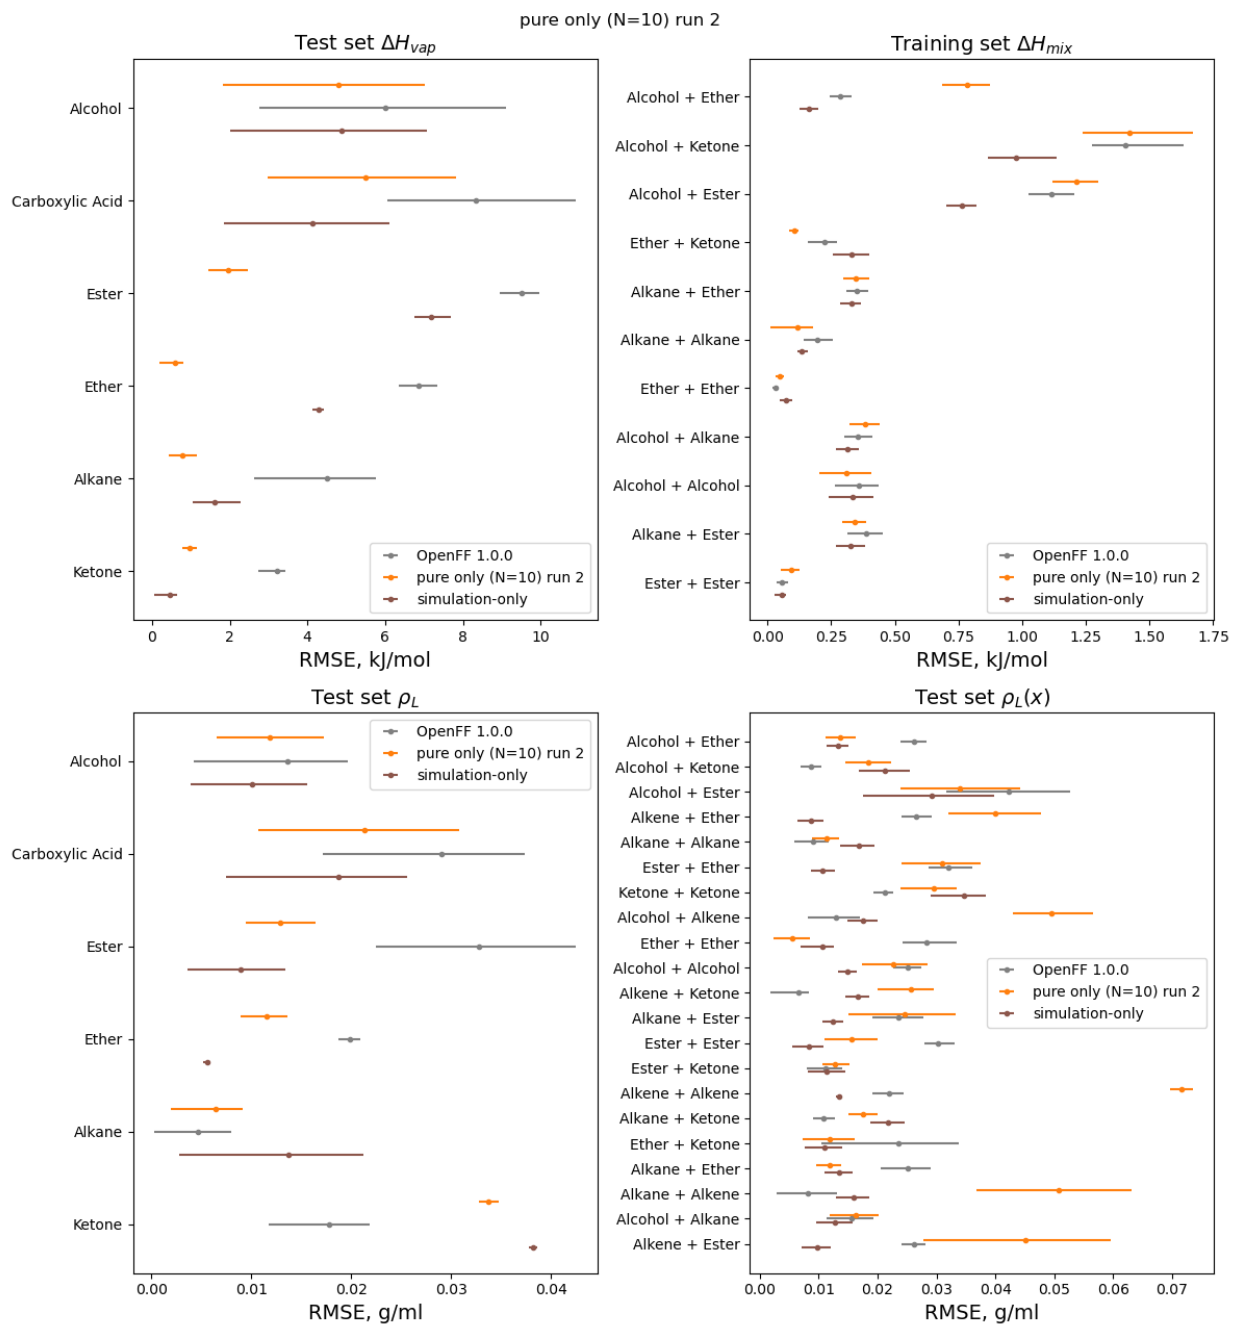

**Figure 35.** Benchmark RMSE over the four types of physical property data in the test set, split by function group or functional group mixture. RMSEs plotted for OpenFF 1.0.0 (gray), multi-fidelity N=10 run 2 against the “pure only” training set (orange), and the simulation-only optimization against the same training set (brown). Error bars represent 95% confidence intervals, bootstrapped over the properties in the dataset.



### 3.1.3 Run 3

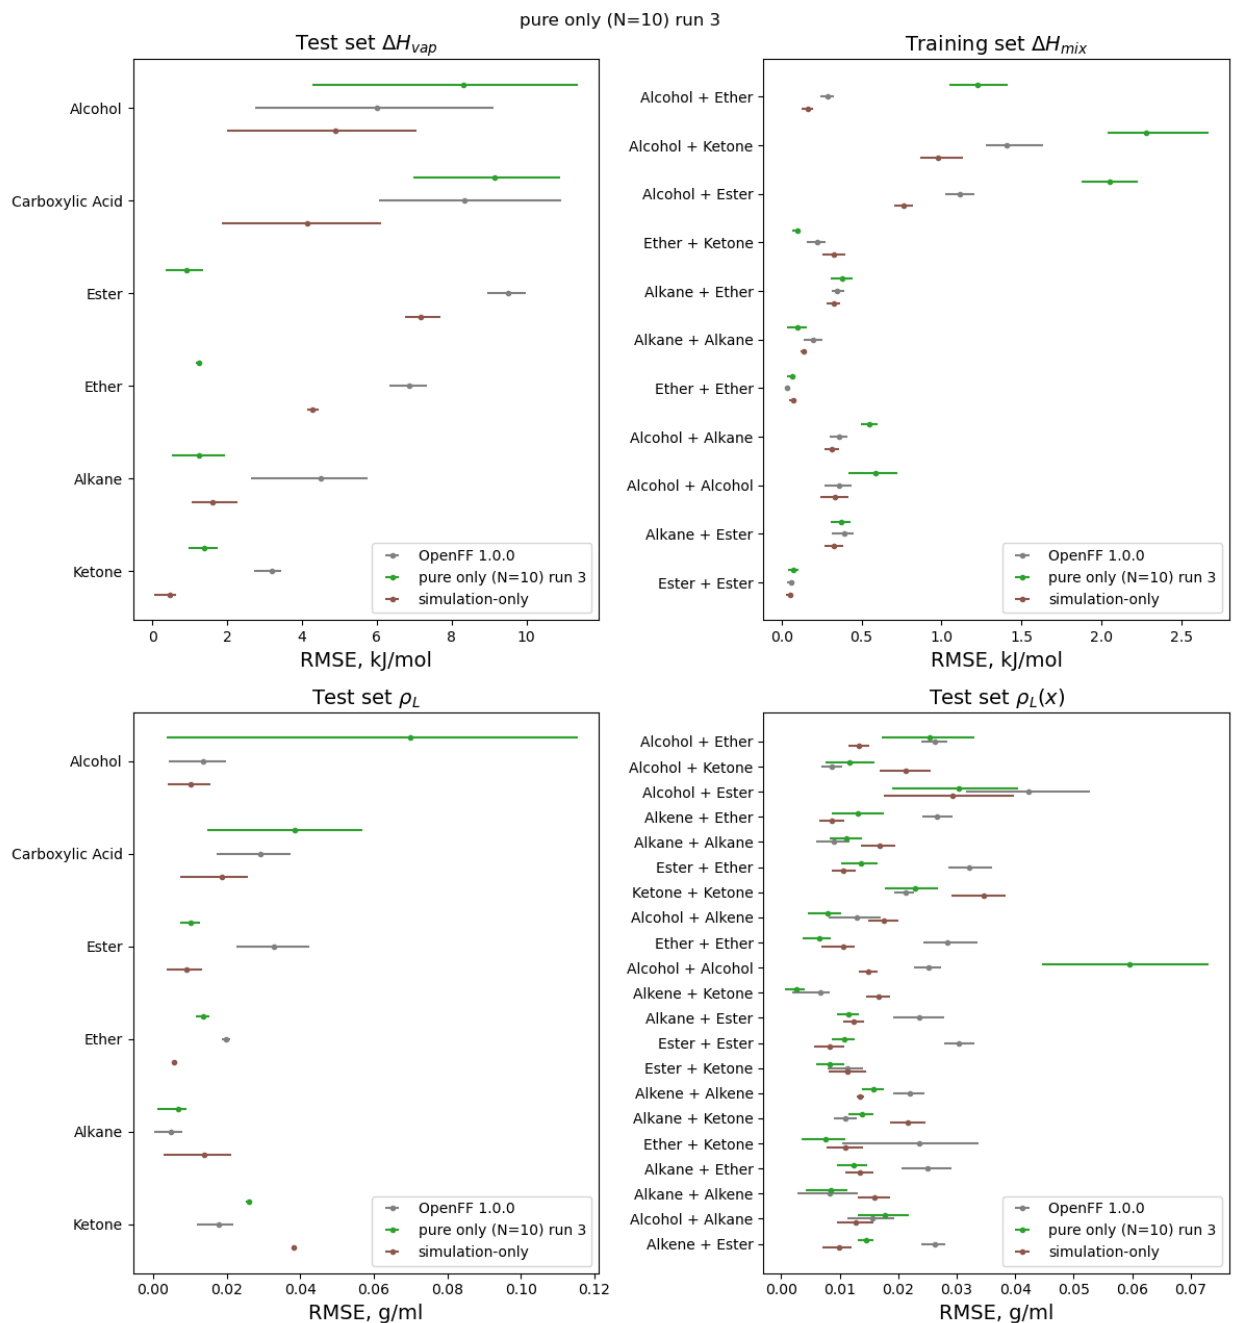

**Figure 36.** Benchmark RMSE over the four types of physical property data in the test set, split by function group or functional group mixture. RMSEs plotted for OpenFF 1.0.0 (gray), multi-fidelity N=10 run 3 against the “pure only” training set (green), and the simulation-only optimization against the same training set (brown). Error bars represent 95% confidence intervals, bootstrapped over the properties in the dataset.

### 3.1.4 Run 4

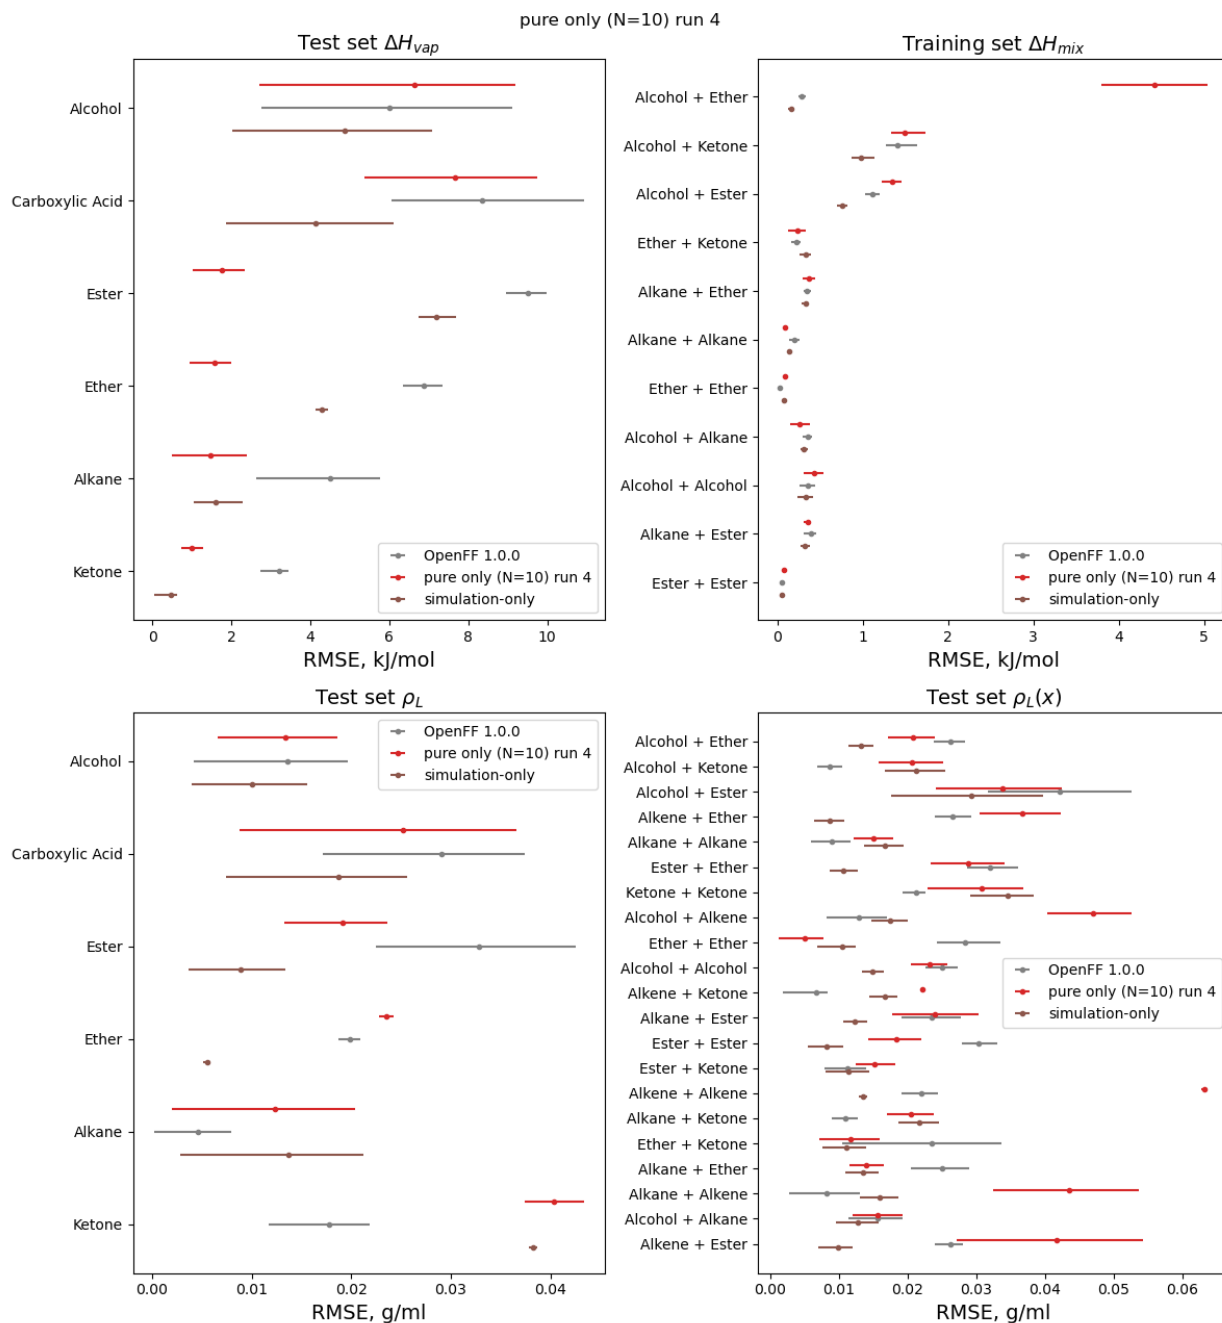

**Figure 37.** Benchmark RMSE over the four types of physical property data in the test set, split by function group or functional group mixture. RMSEs plotted for OpenFF 1.0.0 (gray), multi-fidelity N=10 run 4 against the “pure only” training set (red), and the simulation-only optimization against the same training set (brown). Error bars represent 95% confidence intervals, bootstrapped over the properties in the dataset.

### 3.1.5 Run 5

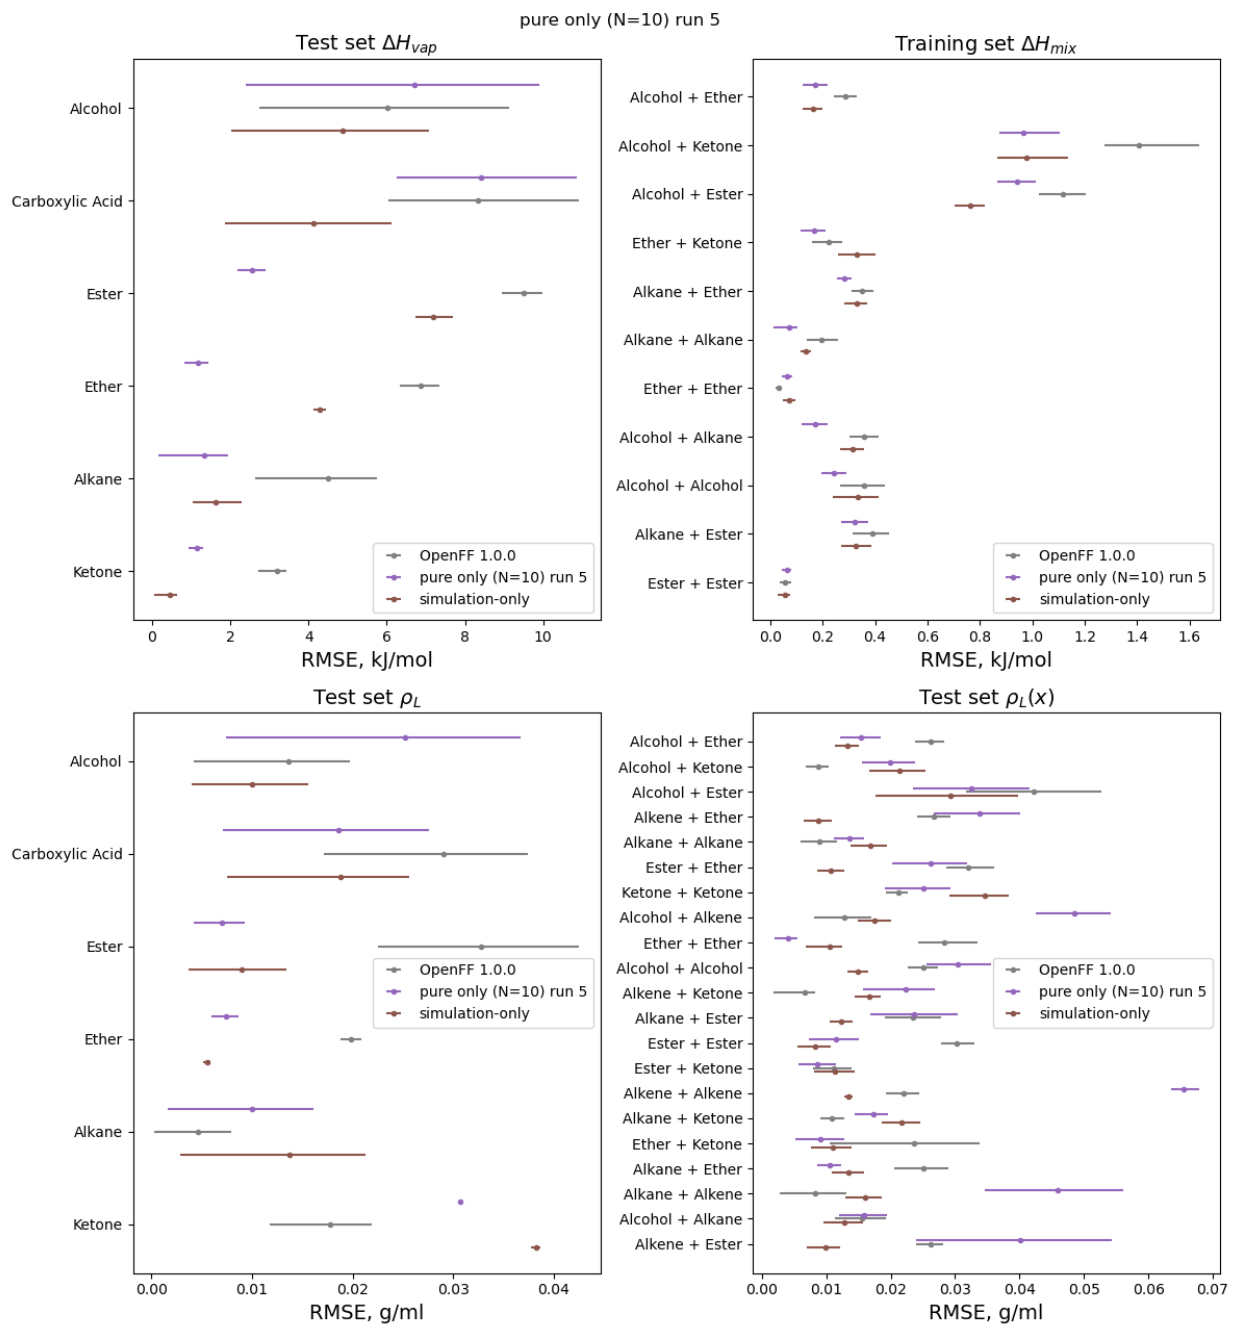

**Figure 38.** Benchmark RMSE over the four types of physical property data in the test set, split by function group or functional group mixture. RMSEs plotted for OpenFF 1.0.0 (gray), multi-fidelity N=10 run 5 against the “pure only” training set (purple), and the simulation-only optimization against the same training set (brown). Error bars represent 95% confidence intervals, bootstrapped over the properties in the dataset.

### 3.2 "Mixture only", N=10

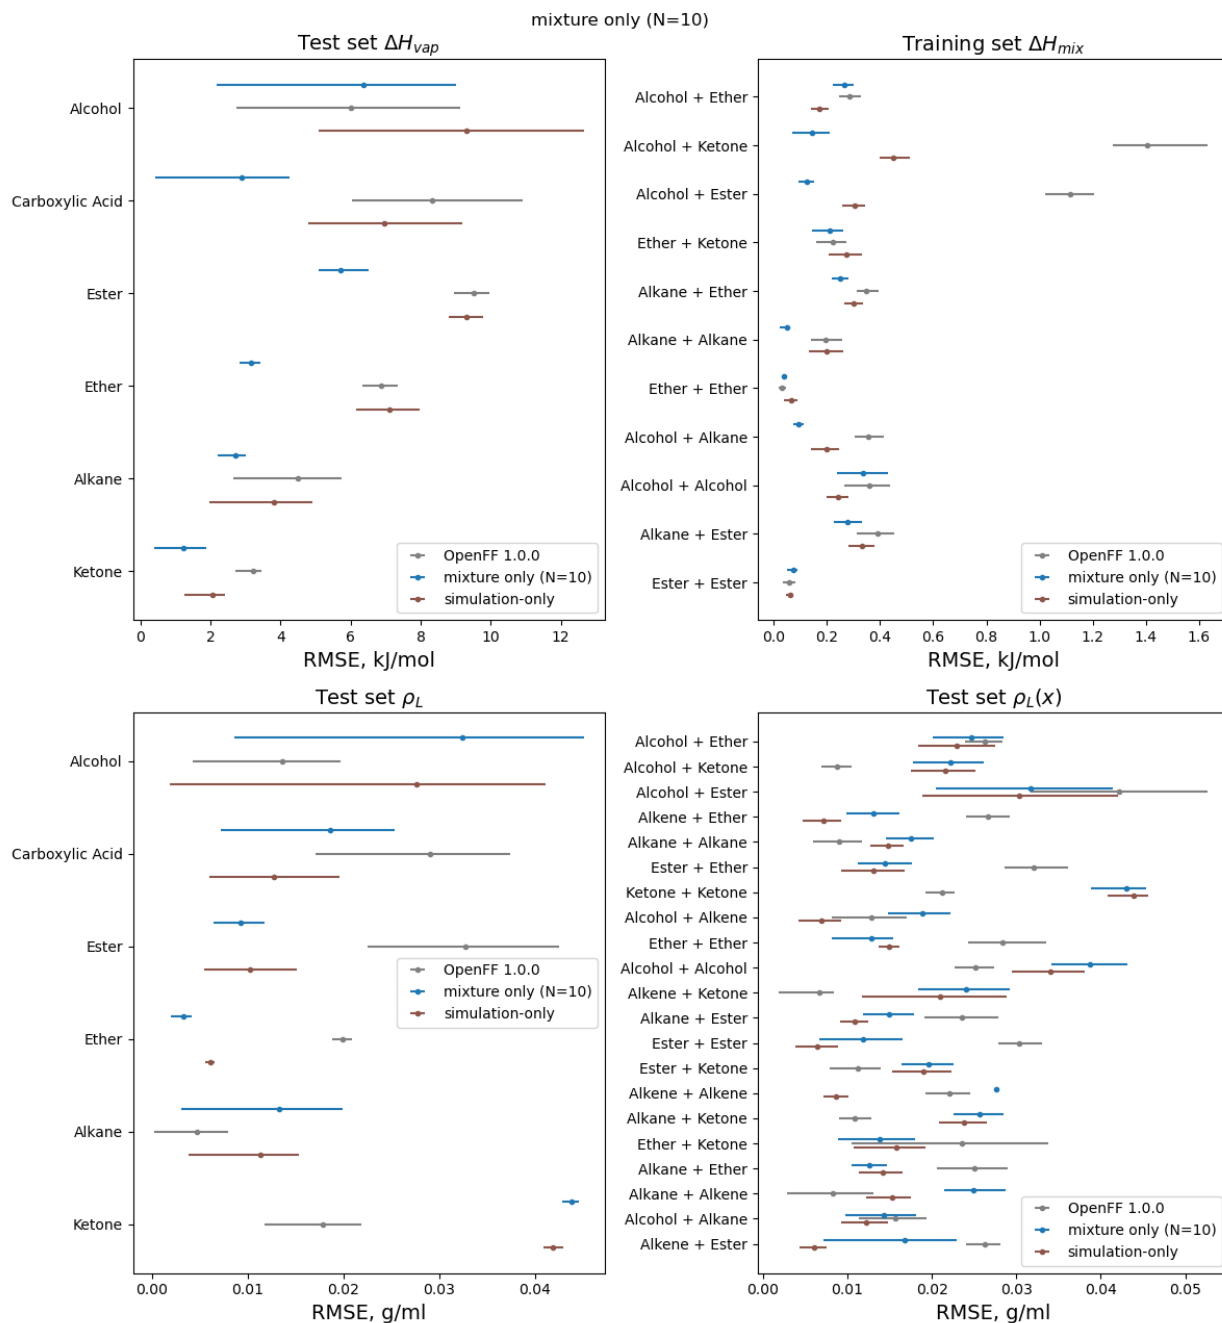

**Figure 39.** Benchmark RMSE over the four types of physical property data in the test set, split by function group or functional group mixture. RMSEs plotted for OpenFF 1.0.0 (gray), multi-fidelity N=10 run against the "mixture only" training set (blue), and the simulation-only optimization against the same training set (brown). Error bars represent 95% confidence intervals, bootstrapped over the properties in the dataset.

### 3.3 "Mixture only", N=20

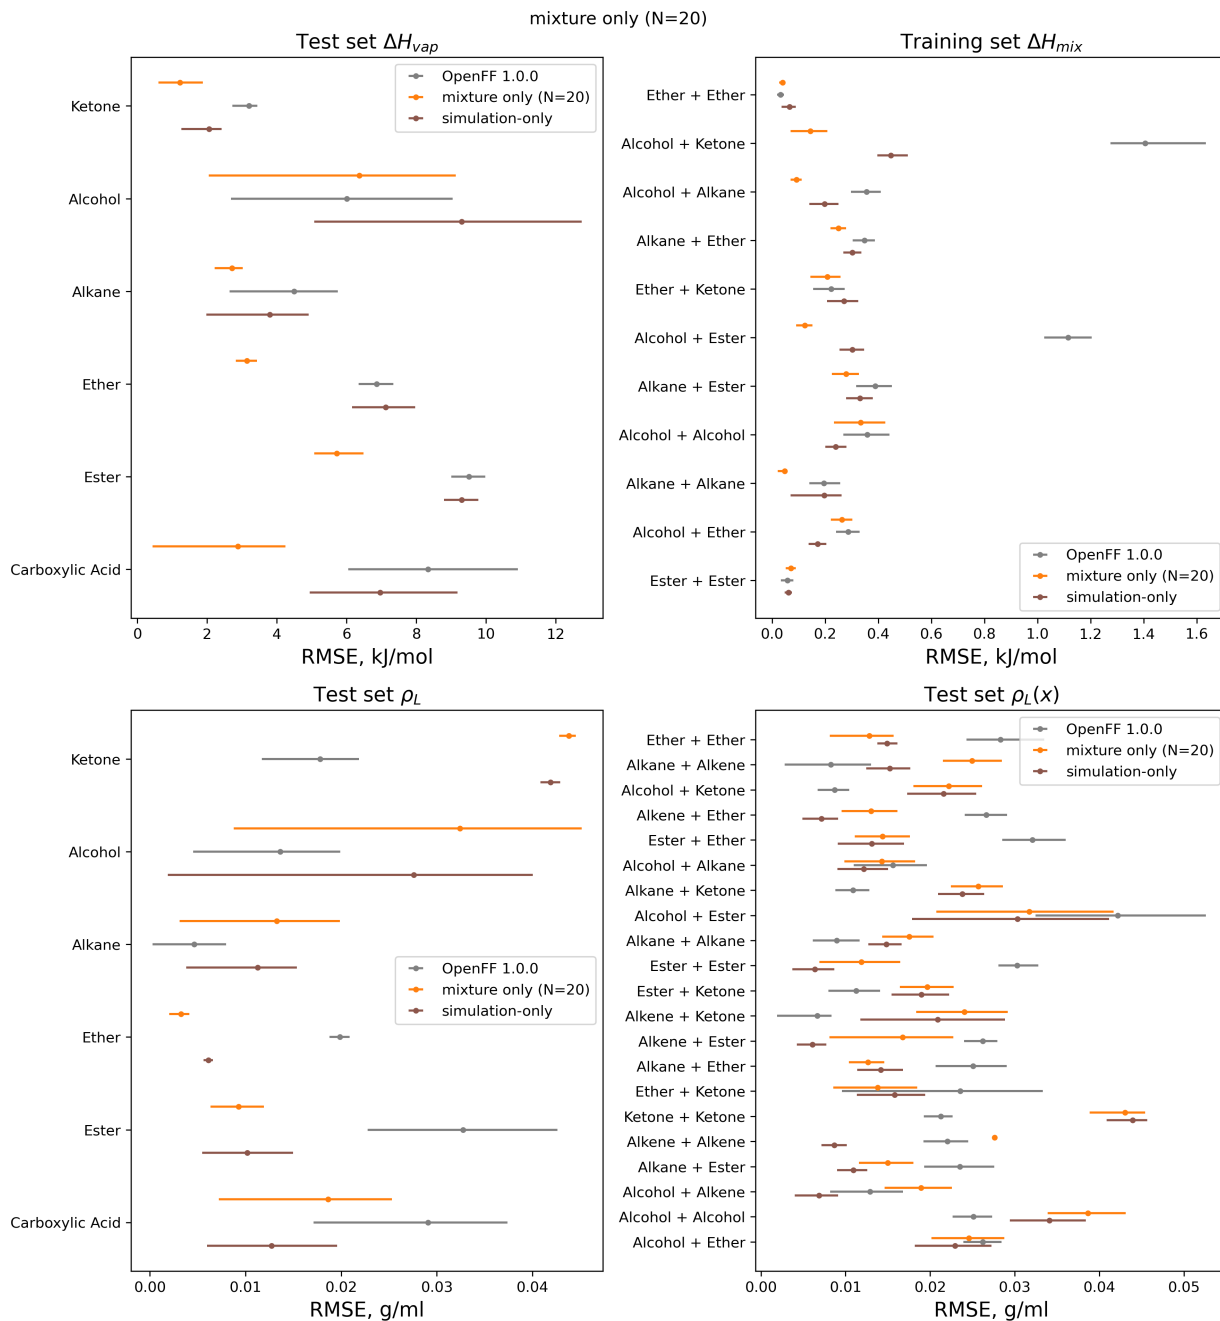

**Figure 40.** Benchmark RMSE over the four types of physical property data in the test set, split by function group or functional group mixture. RMSEs plotted for OpenFF 1.0.0 (gray), multi-fidelity N=20 run against the "mixture only" training set (blue), and the simulation-only optimization against the same training set (brown). Error bars represent 95% confidence intervals, bootstrapped over the properties in the dataset.
